# Supplementary material for: The Hsp70 homolog Ssb and the 14-3-3 protein Bmh1 jointly regulate transcription of glucose repressed genes in Saccharomyces cerevisiae
Source: PubMed Central journal article supplement — Nucleic Acids Res. 2016 Mar 21;44(12):5629–45. doi: 10.1093/nar/gkw168 (PMC4937304; doi:10.1093/nar/gkw168), 2016-03-21
Supplement: supp_gkw168_Supplemental_Material_revised_corr.pdf [file supp_gkw168_Supplemental_Material_revised_corr.pdf]

## **SUPPLEMENTAL MATERIAL**

**Hübscher et al.**

## **SUPPLEMENTAL FIGURES**

A

Snf1

```

10 20 30 40 50 60 70 80 90 100
MSSNNTNTAPANANSSHHHHHHHHHHHHGHGGSNSTLNNPKSSLADGAHIGNYQIVKTLGEGSFGKVKLAYHTTGGQKVALKI INKKVLAKSDMQGRI
110 120 130 140 150 160 170 180 190 200
EREISYLRLLRHPHI IKLYDVIKSKDEIIMVIEYAGNELFDYIVQRDMSEQEARRFFQOIISAVEYCHRRHKIVHRDLKPENLLLDEHLNVKIADFGLSN
210 220 230 240 250 260 270 280 290 300
IMTDGNFLKTS CGSPNYAAPEVISGKLYAGPEVDVWVSCGVILYVMLCRRLPFDDSEIPVLFKNISNGVYTLPKFLSPGAAGLIKRMILVNPLNRSIHEI
310 320 330 340 350 360 370 380 390 400
MQDDWFKVDLPEYLLPDLKPHPEEENENNSKKDGGSPDNDEIDDNLVNISSSTMGYEKDEIYESLESSEDTPAFNERDAYMLIKENKSLIKDMKANK
410 420 430 440 450 460 470 480 490 500
SVSDELDTFLSQSPTFQQQSKSHQKSQVDHETAKQHARRMASAITQQRTYHQSFPMDQYKEEDSTVSI LPTSLPQIHRANMLAQGSPAASKISPLVTKK
510 520 530 540 550 560 570 580 590 600
SKTRWHFGIRSRSYPLDVMGEIYIALKNLGAEWAKPSEEDLWTIKLRWKYDIGNKTNTNEKIPDLMKMVIQLFQIETNNYLVDKFDGWESSYGDTTVS
610 620 630
NISEDEMSTFSAYPFLHLTKLIMELAVNSQSN

```

B

Ssb1

```

10 20 30 40 50 60 70 80 90 100
MAEGVFQGAIGIDLGTYS CVATYESSVEIIANEQGNRVTPSFVAFTPEERLIGDAAKNQAALNPRNTVFDKRLIGRFDDESQKDMKTWPFKVIDVD
110 120 130 140 150 160 170 180 190 200
GNPVIQVQYLEETKTFSPQEISAMVLTKEKEIAEAKIGKKVEKAVITVPAYFNDAQRQATKDAGAISGLNVLRINI NEPTAAAIA YGLGAGKSEKERHVLII
210 220 230 240 250 260 270 280 290 300
FDLGGGTFDVSLLHIAGGVYTVKSTSGNTHLGGQDFDNLLEHFKAEFKKTGLDISDDARALRRLRTAAERAKRTLS SVTQTTVEVDSLFDGEDFESSL
310 320 330 340 350 360 370 380 390 400
TRARFEDLNAALFKSTLEPVEQVLKDAKISKSQIDEVVLVGGSTRIPKVQKLLSDFDGKQLEKSI NPDEAVAYGAAVQGAILTGQSTSDETKDLLLLDV
410 420 430 440 450 460 470 480 490 500
APLSLGVGMQGMDFGIVVPRNTVPTIKRRTFTTCADNQTTVQFPVYQGERVNCENTLLGEFDLKNIPMMPAGEPVLEAIFEVDANGILKVTAVEKSTG
510 520 530 540 550 560 570 580 590 600
KSSNITISNAVGRLSSEEIEKMVNQAEFKAADAEFAKKHEARQRLSESYVASIEQTVTDPVLSKLRGSKSKIEAALSDALAAALQIEDPSADELRKAEV
610
GLKRVVTKAMSSR

```

↑ Δ40                      ↑ Δ23

C

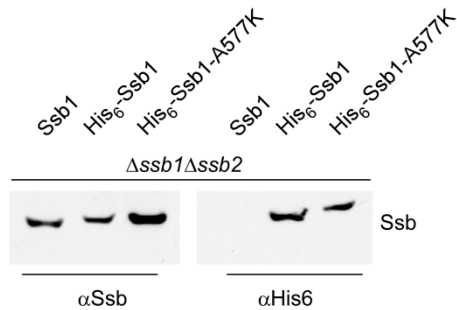

D

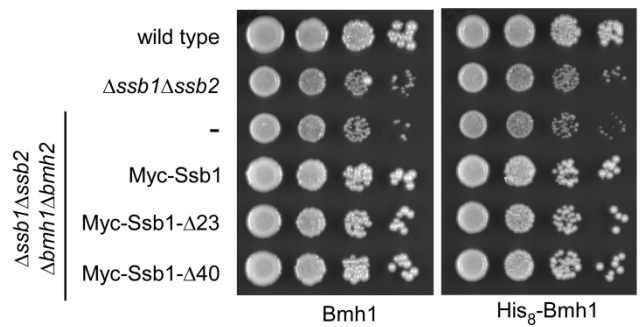

**Figure S1. (A)** Amino acid sequence and domain structure of Snf1. The kinase domain is high-lighted in gray. The domain of Snf1 homologous to the mammalian  $\alpha$ AMPK autoinhibitory domain ( $\alpha$ AID) is high-lighted in green, the adjacent  $\alpha$ -linker in orange (1-3). Amino acids 510-515, which correspond a mode I 14-3-3 binding motif (RSXpSXP) (4,5), and 410-415, which closely resemble the mode I motif are high-lighted in yellow. The natural internal poly-histidine stretch is shown in blue. Residue T210, which was mutated to alanine (Snf1-T210A) and residues S413, R510, and S513, which were mutated to alanine in the Snf1-RSS triple mutant are shown in red. **(B)** Amino acid sequence and domain structure of Ssb1. The nucleotide binding domain is high-lighted in blue, the peptide binding domain is high-lighted in pink. Peptide sequences employed to generate Ssb1-specific polyclonal antibodies (Eurogentec) are high-lighted in gray. Alanine 577 is shown in red; an exchange of A577 to lysine (Ssb1-A577K) leads to better recognition by the Ssb1-specific antibody (see C). The potential, C-terminal mode III 14-3-3 recognition motif (p(S/T)X<sub>1/2</sub>-COOH) is shown in yellow (5,6). **(C)** Total extracts of  $\Delta$ ssb1 $\Delta$ ssb2 strains expressing wild type Ssb1, His<sub>6</sub>-Ssb1, or His<sub>6</sub>-Ssb1-A577K were analyzed via immunoblot analysis employing the Ssb1-specific antibody, or an antibody recognizing the His<sub>6</sub>-tag. **(D)** Strains as indicated were grown on YPD for 2 days at 30°C.

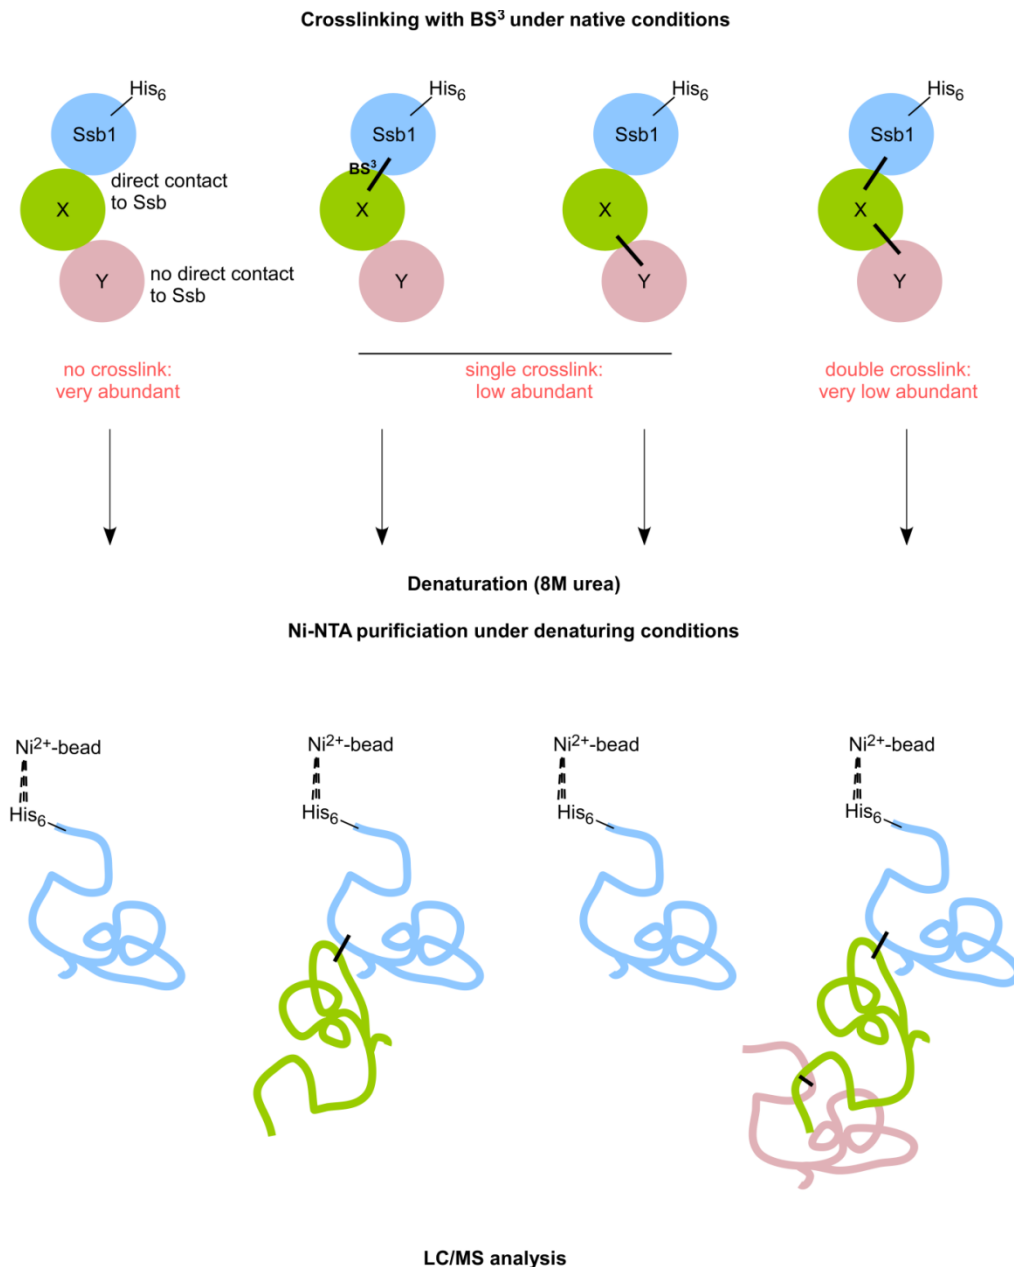

**Figure S2. Experimental outline of the crosslinking approach aimed on the identification of direct Ssb interactors.** Cells expressing His-tagged Ssb (His-Ssb) were shock-frozen in liquid nitrogen, powdered, and then resuspended directly in a buffer containing the homobifunctional amino-reactive crosslinker BS<sup>3</sup>, with a spacer length of 11.4Å. After crosslinking proteins were denatured in 8M urea, His-Ssb and proteins crosslinked to His-Ssb, were purified via Ni-NTA, and were subsequently identified via LC/MS (see Materials and Methods). Because crosslinking in this experimental system was inherently inefficient, the bulk of His-Ssb migrated as a monomer. Only a minor fraction of His-Ssb was covalently crosslinked to proteins in close proximity ( $\leq 11.4\text{\AA}$ , protein X, in green). Crosslinks between Ssb and nascent polypeptides were below the detection limit of the LC/MS analysis. Likewise, double-crosslinks, which connect Ssb to two proteins (e.g. protein X and protein Y, shown in pink) via 2 molecules of BS<sup>3</sup> are very low abundant and likely below the detection limit. This holds especially true if proteins X and/or Y are low abundant, as e.g. components of the SNF1/Glc7 pathway. See also Fig. 3 and Table S4.

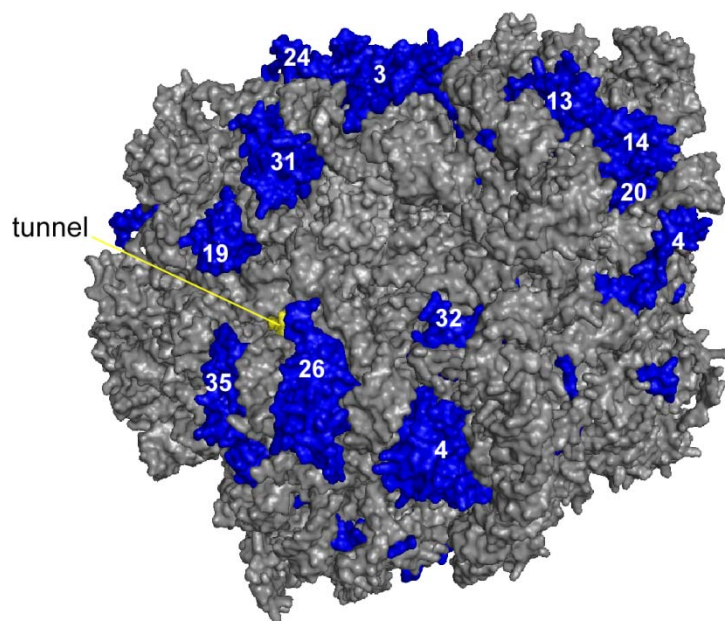

**Figure S3.** Localization of large ribosomal subunit proteins, which formed crosslinks with Ssb (Table 1). Ribosomal proteins in proximity to Ssb did not randomly scatter over the surface of the large subunit, but formed a rim-like pattern, excluding specific regions of the ribosomal surface. Shown is a view of the *S. cerevisiae* large ribosomal subunit based on PDB code 3U5H/3U5I (7,8).

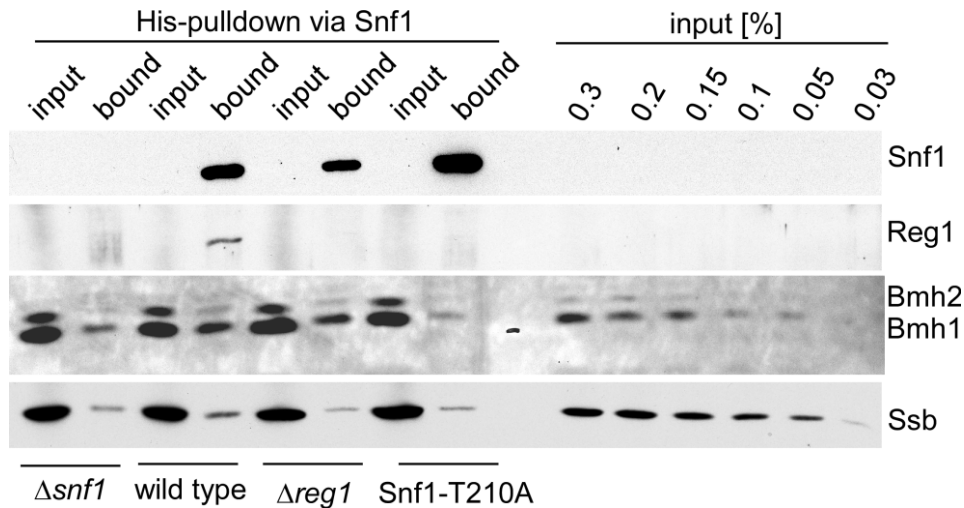

**Figure S4. Estimation of the fraction of affinity purified Snf1 bound to (Bmh)<sub>2</sub> or Ssb.** A yeast cell contains approximately 280.000 molecules of Ssb1/Ssb2 (9), 600 molecules of Snf1 (10), 2600 molecules of Reg1 (10), and 200.000 molecules of Bmh1/Bmh2 (10). Because 14-3-3 proteins function as homo- or heterodimers (11) this corresponds to ~ 100.000 molecules of active (Bmh)<sub>2</sub>. If each molecule of Snf1 was in a complex with Ssb and/or (Bmh)<sub>2</sub>, ~ 0.2% of total Ssb (600 molecules of the total 280.000 molecules) and ~ 0.6% of total (Bmh)<sub>2</sub> (600 molecules of the total 100.000 molecules) were expected to co-purify with Snf1. The left part of the Figure shows the affinity purification of Snf1 from the indicated strains. This part of the Figure is also shown in Fig. 3C, which contains details on the experiment. To estimate what fraction of Ssb and (Bmh)<sub>2</sub> co-purified with Snf1, a dilution series of the input was analyzed on the same gel/blot (0.3 - 0.03% input: fraction of cell extract added to the Ni-NTA pull down reaction). Based on 3 independent experiments, one of which is shown, approximately 0.2-0.3% of the (Bmh)<sub>2</sub> input was co-purified with Snf1 in extracts derived from wild type or  $\Delta reg1$  cells. (Bmh)<sub>2</sub> did not co-purify with Snf1 in the extract derived from Snf1-T210A. Assuming that the bulk of Snf1 was recovered in the bound material, one can estimate that about 30-50% of Snf1 was in a complex with (Bmh)<sub>2</sub> under these conditions. A more precise analysis is hindered by the strong imbalance between the Snf1 and Bmh expression level and by background binding of Bmh, which is likely due to the binding of Bmh to other proteins, as for example Cyr1 or Rom2 (12), containing internal poly-histidine segments (Table S4). If Ssb was bound to 30-50% of affinity purified Snf1, approximately 0.05-0.1% of Ssb contained in the input should copurify with Snf1. Due to background binding of Ssb in the  $\Delta snf1$  strain, and due to variations within the experiments, this was below the detection limit of the experimental setup. Interaction between Snf1 and Ssb, however, was revealed via the crosslinking approach (see Fig. 3B, 3C, and Table S4).

**A**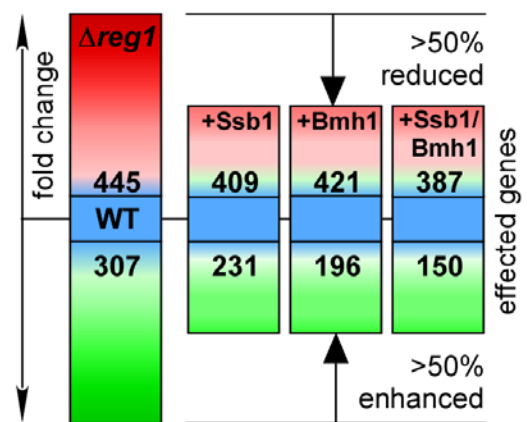**B**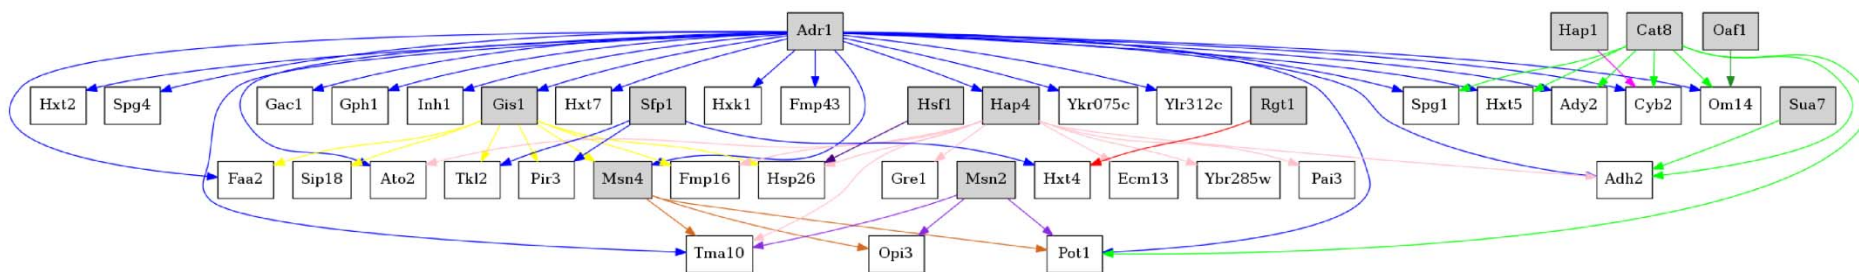

C

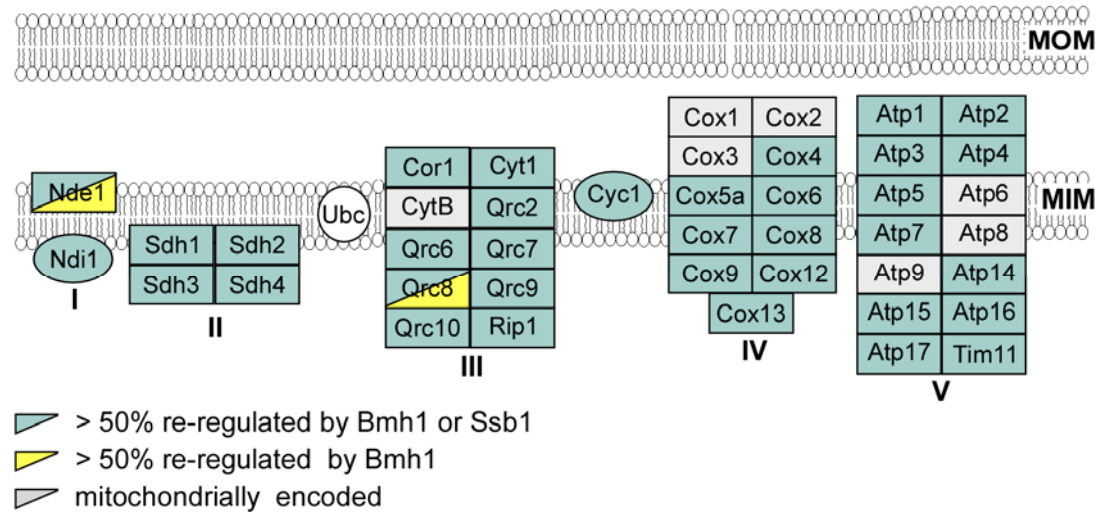

**Figure S5. (A)** Genes de-regulated in  $\Delta reg1$  and re-regulated by overexpression of Ssb1 or Bmh1 by at least 50% (Table S2). **(B)** TF ranking of the 53 genes up-regulated  $\geq 1.5$ -fold in the  $\Delta reg1$  strain and re-regulated by overexpression of Bmh1 to an effect size of  $\leq 0.66$  (over-regulated genes, Table S2, Fig. 4F). TFs are shown in gray and target genes in white. Analysis was performed via the YEASTRACT TFRank tool (13). Filters of the tool were set to allow for the analysis of only documented transcription factors (activators and inhibitors) based on DNA binding plus expression evidence. The filter for documented regulations by environmental condition was set to *carbon source quality/availability, glucose limitation*. TFRank heat diffusion coefficient was set 0.5 (13). **(C)** Schematic representation of genes coding for yeast respiratory chain components (14). Nuclear-encoded genes de-regulated  $\geq 1.5$ -fold in  $\Delta reg1$  and re-regulated by at least 50% by Ssb1 or Bmh1 overexpression are shown in blue. Nuclear-encoded genes re-regulated by Bmh1 only are shown in yellow. Mitochondrially encoded genes (gray) were not included in the microarray analysis. MOM: mitochondrial outer membrane; MIM: mitochondrial inner membrane. Original data are shown in Table S2.



## SUPPLEMENTAL TABLES

**Table S1. Strains and plasmids.**

| strains                                                   | plasmids                                                         | reference                                                                               |
|-----------------------------------------------------------|------------------------------------------------------------------|-----------------------------------------------------------------------------------------|
| MH272-3f a/α                                              | ( <i>ura3/ura3, leu2/leu2, his3/his3, trp1/trp1, ade2/ade2</i> ) | -                                                                                       |
| MH272-3f α                                                | <i>ura3 leu2 his3 trp1 ade2</i>                                  | -                                                                                       |
| Δ <i>ssb1</i> Δ <i>ssb2</i> α                             | <i>ssb1::ADE2 ssb2::HIS3</i>                                     | -                                                                                       |
| Δ <i>reg1</i> α                                           | <i>reg1::LEU2</i>                                                | -                                                                                       |
|                                                           | pYEplac195-SSB1                                                  | 2μ, <i>URA3, SSB1</i> +/- 300                                                           |
|                                                           | pYEplac112-BMH1                                                  | 2μ, <i>TRP1, BMH1</i> +/- 300                                                           |
| Δ <i>snf1</i> α                                           | <i>snf1::kanMX4</i>                                              | -                                                                                       |
|                                                           | pYCplac33-SNF1                                                   | cen, <i>URA3, SNF1</i> +/- 300                                                          |
|                                                           | pYCplac33-SNF1-T210A                                             | cen, <i>URA3, SNF1 T210A</i> +/- 300                                                    |
|                                                           | pYCplac33-SNF1-RSS                                               | cen, <i>URA3, SNF1 S413A, R510A, S513A</i> +/- 300                                      |
| Δ <i>ssb1</i> Δ <i>ssb2</i> Δ <i>snf1</i> α               | <i>ssb1::ADE2 ssb2::HIS3 snf1::kanMX4</i>                        | -                                                                                       |
|                                                           | pYCplac22-FLAG-SNF1 + pYEplac195-SSB1-A577K                      | 2μ, <i>URA3, SSB1A577K</i> +/-300<br>cen, <i>TRP1, FLAG-SNF1</i> +/-300                 |
|                                                           | pYCplac33-FLAG-SNF1 + pYEplac112-HIS <sub>6</sub> -SSB1-A577K    | 2μ, <i>TRP1, His<sub>6</sub>-SSB1A577K</i> +/-300<br>cen, <i>URA3, FLAG-SNF1</i> +/-300 |
| Δ <i>glc7</i> α                                           | <i>glc7::TRP1</i>                                                | -                                                                                       |
|                                                           | pYCplac111-GLC7                                                  | cen, <i>LEU2, GLC7</i> +/- 300                                                          |
|                                                           | pYCplac111-GLC7 + pYEplac195-SSB1                                | cen, <i>LEU2, GLC7</i> +/- 300<br>2μ, <i>URA3, SSB1</i> +/- 300                         |
|                                                           | pYCplac111-GLC7 + pYEplac195-BMH1                                | cen, <i>LEU2, GLC7</i> +/- 300<br>2μ, <i>URA3, BMH1</i> +/- 300                         |
|                                                           | pYCplac111-GLC7-T152K                                            | cen, <i>LEU2, GLC7 T152K</i> +/- 300                                                    |
|                                                           | pYCplac111-GLC7-T152K + pYEplac195-SSB1                          | cen, <i>LEU2, GLC7T152K</i> +/- 300<br>2μ, <i>URA3, SSB1</i> +/- 300                    |
|                                                           | pYCplac111-GLC7-T152K + pYEplac195-BMH1                          | cen, <i>LEU2, GLC7T152K</i> +/- 300<br>2μ, <i>URA3, BMH1</i> +/- 300                    |
| Δ <i>bmh1</i> Δ <i>bmh2</i> α                             | <i>bmh1::kanMX4 bmh2::kanMX4</i>                                 | -                                                                                       |
| Δ <i>bmh1</i> Δ <i>bmh2</i> Δ <i>ssb1</i> Δ <i>ssb2</i> α | <i>ssb1::ADE2 ssb2::ADE2 bmh1::kanMX4 bmh2::kanMX4</i>           | -                                                                                       |
|                                                           | pTet111-BMH1 + pCM190 Myc-SSB1                                   | cen, <i>LEU2, BMH1</i> ; 2μ, <i>URA3, Myc-SSB1</i>                                      |
|                                                           | pTet111-His <sub>6</sub> -BMH1 + pCM190 Myc-SSB1                 | cen, <i>LEU2, His<sub>6</sub>-BMH1</i> ; 2μ, <i>URA3, Myc-SSB1</i>                      |
|                                                           | pTet111-His <sub>6</sub> -BMH1 + pCM190 Myc-SSB1-Δ23             | cen, <i>LEU2, His<sub>6</sub>-BMH1</i> ; 2μ, <i>URA3, Myc-SSB1-Δ23</i>                  |
|                                                           | pTet111-His <sub>6</sub> -BMH1 + pCM190 Myc-SSB1-Δ40             | cen, <i>LEU2, His<sub>6</sub>-BMH1</i> ; 2μ, <i>URA3, Myc-SSB1-Δ40</i>                  |
| Δ <i>sit4</i> α                                           | <i>sit4::kanMX4</i>                                              | -                                                                                       |
|                                                           | pYEplac195-SSB1                                                  | 2μ, <i>URA3, SSB1</i> +/- 300                                                           |
|                                                           | pYEplac112-BMH1                                                  | 2μ, <i>URA3, BMH1</i> +/- 300                                                           |
| Δ <i>sit4</i> Δ <i>reg1</i> α                             | <i>reg1::LEU2 sit4::kanMX4</i>                                   | -                                                                                       |
|                                                           | pYEplac195-SSB1                                                  | 2μ, <i>URA3, SSB1</i> +/- 300                                                           |
|                                                           | pYEplac195-BMH1                                                  | 2μ, <i>URA3, BMH1</i> +/- 300                                                           |

**Table S2.** Micro array data. See Table S2.xls

**Table S3.** TF analysis. **(A-D)** TF target enrichment in up- and down-regulated genes in  $\Delta ssb1\Delta ssb2$  and  $\Delta reg1$ . Sample frequency is the number of TF targets in the respective data sets of up- or down-regulated genes in  $\Delta ssb1\Delta ssb2$  or  $\Delta reg1$ ; background frequency is the number of targets of the respective TF in the whole genome. Absolute and relative frequencies (in %) are given. p-values are right-sided p-values calculated with Fisher's exact test. TFs with highly significant p-values smaller than  $10^{-9}$  were considered for further analysis. For comparison the Bonferroni-corrected  $\alpha$ -level ( $\alpha^{BON} = 0.05/n$ ,  $n$  = number of tests) for each analysis is given. **(E)** Overlap of up-regulated genes in  $\Delta ssb1\Delta ssb2$  and  $\Delta reg1$  and genes up-regulated in a continuously growing batch culture at different  $OD_{600}$ . Overlap frequency is the number of genes up-regulated in the batch culture which are also up-regulated in  $\Delta ssb1\Delta ssb2$  or  $\Delta reg1$ ; background frequency is the number of up-regulated genes in the batch culture with respect to the total number of genes. Absolute and relative frequencies (in %) are given. p-values are right-sided p-values calculated with Fisher's exact test. p-values smaller than a Bonferroni-corrected  $\alpha$  of 0.0042 were considered significant.

**(A) TF enrichment in up-regulated genes in  $\Delta ssb1\Delta ssb2$** 

| Transcription factor | Sample frequency | Background frequency | p-value      |
|----------------------|------------------|----------------------|--------------|
| Sok2p                | 279/426 (65.49%) | 2255/5820 (38.75%)   | 3.992447E-31 |
| Rgm1p                | 90/426 (21.13%)  | 395/5820 (6.79%)     | 2.086345E-24 |
| Sut1p                | 89/426 (20.89%)  | 417/5820 (7.16%)     | 5.326451E-22 |
| Rlm1p                | 117/426 (27.46%) | 711/5820 (12.22%)    | 4.474686E-19 |
| Wtm2p                | 46/426 (10.8%)   | 168/5820 (2.89%)     | 7.224534E-16 |
| Bas1p                | 275/426 (64.55%) | 2755/5820 (47.34%)   | 8.631703E-14 |
| Rpi1p                | 43/426 (10.09%)  | 173/5820 (2.97%)     | 2.811152E-13 |
| Arg80p               | 70/426 (16.43%)  | 395/5820 (6.79%)     | 6.553325E-13 |
| Pho2p                | 137/426 (32.16%) | 1075/5820 (18.47%)   | 1.110849E-12 |
| Hap4p                | 118/426 (27.7%)  | 881/5820 (15.14%)    | 2.828453E-12 |
| YER184C              | 46/426 (10.8%)   | 210/5820 (3.61%)     | 5.255836E-12 |
| Gis1p                | 65/426 (15.26%)  | 371/5820 (6.37%)     | 8.542574E-12 |

|         |                  |                    |              |
|---------|------------------|--------------------|--------------|
| YER130C | 40/426 (9.39%)   | 174/5820 (2.99%)   | 2.886058E-11 |
| Adr1p   | 110/426 (25.82%) | 827/5820 (14.21%)  | 3.317118E-11 |
| Crz1p   | 77/426 (18.08%)  | 500/5820 (8.59%)   | 6.45219E-11  |
| Flo8p   | 89/426 (20.89%)  | 618/5820 (10.62%)  | 6.496097E-11 |
| Swi4p   | 131/426 (30.75%) | 1067/5820 (18.33%) | 7.275546E-11 |
| Nrg2p   | 60/426 (14.08%)  | 346/5820 (5.95%)   | 9.443813E-11 |
| Nrg1p   | 98/426 (23%)     | 720/5820 (12.37%)  | 1.520818E-10 |
| Rpn4p   | 190/426 (44.6%)  | 1783/5820 (30.64%) | 1.98059E-10  |
| Gat4p   | 44/426 (10.33%)  | 218/5820 (3.75%)   | 2.769906E-10 |
| Rsc1p   | 94/426 (22.07%)  | 687/5820 (11.8%)   | 3.035576E-10 |
| Rds1p   | 49/426 (11.5%)   | 260/5820 (4.47%)   | 3.144958E-10 |
| Hel2p   | 42/426 (9.86%)   | 203/5820 (3.49%)   | 3.227661E-10 |
| Cup2p   | 83/426 (19.48%)  | 578/5820 (9.93%)   | 3.927403E-10 |
| Hap1p   | 56/426 (13.15%)  | 328/5820 (5.64%)   | 7.9887E-10   |
| Fhl1p   | 142/426 (33.33%) | 1241/5820 (21.32%) | 1.5227512E-9 |
| Hot1p   | 23/426 (5.4%)    | 77/5820 (1.32%)    | 2.5557246E-9 |
| Sko1p   | 113/426 (26.53%) | 925/5820 (15.89%)  | 3.6258586E-9 |
| Haa1p   | 89/426 (20.89%)  | 667/5820 (11.46%)  | 3.8332876E-9 |
| Skn7p   | 112/426 (26.29%) | 922/5820 (15.84%)  | 6.1390502E-9 |
| YPR015C | 30/426 (7.04%)   | 138/5820 (2.37%)   | 3.8128505E-8 |
| Spt23p  | 185/426 (43.43%) | 1827/5820 (31.39%) | 3.8575915E-8 |
| Mot3p   | 78/426 (18.31%)  | 586/5820 (10.07%)  | 4.9924813E-8 |
| Yhp1p   | 140/426 (32.86%) | 1287/5820 (22.11%) | 6.9123431E-8 |
| YPR022C | 27/426 (6.34%)   | 121/5820 (2.08%)   | 1.0548014E-7 |
| Mac1p   | 65/426 (15.26%)  | 465/5820 (7.99%)   | 1.2822461E-7 |
| Rds2p   | 74/426 (17.37%)  | 561/5820 (9.64%)   | 1.7308492E-7 |
| Kss1p   | 34/426 (7.98%)   | 186/5820 (3.2%)    | 4.130562E-7  |

|         |                  |                    |              |
|---------|------------------|--------------------|--------------|
| Mig3p   | 168/426 (39.44%) | 1669/5820 (28.68%) | 4.5270421E-7 |
| Yap6p   | 110/426 (25.82%) | 975/5820 (16.75%)  | 5.3259679E-7 |
| Gcn4p   | 267/426 (62.68%) | 2994/5820 (51.44%) | 8.1279311E-7 |
| Mig1p   | 61/426 (14.32%)  | 449/5820 (7.71%)   | 9.1105817E-7 |
| Hmo1p   | 112/426 (26.29%) | 1010/5820 (17.35%) | 9.9646793E-7 |
| Stp4p   | 32/426 (7.51%)   | 176/5820 (3.02%)   | 1.0380864E-6 |
| Cbf1p   | 154/426 (36.15%) | 1523/5820 (26.17%) | 1.5062338E-6 |
| Ssn2p   | 46/426 (10.8%)   | 309/5820 (5.31%)   | 1.89341E-6   |
| YPR196W | 30/426 (7.04%)   | 167/5820 (2.87%)   | 2.9567802E-6 |
| Ric1p   | 77/426 (18.08%)  | 648/5820 (11.13%)  | 6.4281115E-6 |
| Gcr2p   | 133/426 (31.22%) | 1308/5820 (22.47%) | 9.1291091E-6 |
| Mbf1p   | 32/426 (7.51%)   | 198/5820 (3.4%)    | 0.0000140203 |
| Phd1p   | 86/426 (20.19%)  | 763/5820 (13.11%)  | 0.0000141607 |
| Hap3p   | 43/426 (10.09%)  | 303/5820 (5.21%)   | 0.0000145633 |
| Yox1p   | 141/426 (33.1%)  | 1428/5820 (24.54%) | 0.0000217075 |
| Ino2p   | 55/426 (12.91%)  | 431/5820 (7.41%)   | 0.0000223054 |
| Hap5p   | 56/426 (13.15%)  | 447/5820 (7.68%)   | 0.0000320131 |
| Zap1p   | 147/426 (34.51%) | 1530/5820 (26.29%) | 0.000059056  |
| Oaf3p   | 52/426 (12.21%)  | 416/5820 (7.15%)   | 0.0000669405 |
| Oaf1p   | 94/426 (22.07%)  | 891/5820 (15.31%)  | 0.0000769223 |
| Arr1p   | 152/426 (35.68%) | 1601/5820 (27.51%) | 0.0000779499 |
| Pdr1p   | 139/426 (32.63%) | 1438/5820 (24.71%) | 0.0000788786 |
| Mga2p   | 112/426 (26.29%) | 1107/5820 (19.02%) | 0.0000812356 |
| Msn2p   | 285/426 (66.9%)  | 3411/5820 (58.61%) | 0.0001613866 |
| Sip3p   | 14/426 (3.29%)   | 65/5820 (1.12%)    | 0.0001956323 |
| Smk1p   | 20/426 (4.69%)   | 115/5820 (1.98%)   | 0.0002148201 |
| Mcm1p   | 155/426 (36.39%) | 1670/5820 (28.69%) | 0.0002151391 |

|         |                  |                    |              |
|---------|------------------|--------------------|--------------|
| Cin5p   | 194/426 (45.54%) | 2180/5820 (37.46%) | 0.0002382381 |
| YLR278C | 50/426 (11.74%)  | 425/5820 (7.3%)    | 0.000419677  |
| Rme1p   | 49/426 (11.5%)   | 416/5820 (7.15%)   | 0.0004673478 |
| Bye1p   | 23/426 (5.4%)    | 150/5820 (2.58%)   | 0.0005035076 |
| Swi5p   | 174/426 (40.85%) | 1944/5820 (33.4%)  | 0.0005070989 |
| Sut2p   | 25/426 (5.87%)   | 174/5820 (2.99%)   | 0.000787648  |
| Tbs1p   | 17/426 (3.99%)   | 102/5820 (1.75%)   | 0.0010418114 |
| Sif2p   | 49/426 (11.5%)   | 432/5820 (7.42%)   | 0.0011007993 |
| Mga1p   | 72/426 (16.9%)   | 703/5820 (12.08%)  | 0.0014696669 |
| YGR067C | 25/426 (5.87%)   | 183/5820 (3.14%)   | 0.0016432371 |
| Rox1p   | 88/426 (20.66%)  | 900/5820 (15.46%)  | 0.0017811057 |
| Gat3p   | 49/426 (11.5%)   | 446/5820 (7.66%)   | 0.0021873814 |
| Yrm1p   | 219/426 (51.41%) | 2605/5820 (44.76%) | 0.0024843336 |
| Rtg3p   | 68/426 (15.96%)  | 671/5820 (11.53%)  | 0.0026481118 |
| YFL052W | 14/426 (3.29%)   | 85/5820 (1.46%)    | 0.0031642272 |
| Stb2p   | 28/426 (6.57%)   | 224/5820 (3.85%)   | 0.0033857338 |
| Msn4p   | 215/426 (50.47%) | 2565/5820 (44.07%) | 0.0034256712 |
| Opi1p   | 42/426 (9.86%)   | 379/5820 (6.51%)   | 0.0038559084 |
| Vms1p   | 24/426 (5.63%)   | 185/5820 (3.18%)   | 0.0040271711 |
| Cac2p   | 67/426 (15.73%)  | 672/5820 (11.55%)  | 0.0042552951 |
| Stp2p   | 64/426 (15.02%)  | 643/5820 (11.05%)  | 0.0054281937 |
| Mbp1p   | 68/426 (15.96%)  | 691/5820 (11.87%)  | 0.0054440034 |
| Stp1p   | 70/426 (16.43%)  | 717/5820 (12.32%)  | 0.0058083445 |
| Stb5p   | 106/426 (24.88%) | 1162/5820 (19.97%) | 0.005862477  |
| Gzf3p   | 33/426 (7.75%)   | 288/5820 (4.95%)   | 0.0061057471 |
| Cad1p   | 76/426 (17.84%)  | 794/5820 (13.64%)  | 0.0066470286 |
| Abf1p   | 230/426 (53.99%) | 2811/5820 (48.3%)  | 0.0083978077 |

|        |                  |                    |              |
|--------|------------------|--------------------|--------------|
| Srb8p  | 57/426 (13.38%)  | 572/5820 (9.83%)   | 0.0084543192 |
| Azf1p  | 24/426 (5.63%)   | 198/5820 (3.4%)    | 0.0093927392 |
| Ssn3p  | 13/426 (3.05%)   | 87/5820 (1.49%)    | 0.0100649539 |
| Rfx1p  | 67/426 (15.73%)  | 703/5820 (12.08%)  | 0.0119411172 |
| Swi6p  | 71/426 (16.67%)  | 754/5820 (12.96%)  | 0.0127018251 |
| Fkh1p  | 75/426 (17.61%)  | 807/5820 (13.87%)  | 0.0141366789 |
| Spt2p  | 40/426 (9.39%)   | 386/5820 (6.63%)   | 0.0143744148 |
| Gcr1p  | 139/426 (32.63%) | 1630/5820 (28.01%) | 0.0166774788 |
| Tod6p  | 12/426 (2.82%)   | 84/5820 (1.44%)    | 0.0183993053 |
| Msi1p  | 26/426 (6.1%)    | 236/5820 (4.06%)   | 0.0223976947 |
| War1p  | 12/426 (2.82%)   | 87/5820 (1.49%)    | 0.0237106854 |
| Pho4p  | 120/426 (28.17%) | 1406/5820 (24.16%) | 0.0269255153 |
| Aft1p  | 118/426 (27.7%)  | 1385/5820 (23.8%)  | 0.0297597824 |
| Rgt1p  | 47/426 (11.03%)  | 496/5820 (8.52%)   | 0.0364453695 |
| Hsf1p  | 143/426 (33.57%) | 1726/5820 (29.66%) | 0.0385034302 |
| Gsm1p  | 19/426 (4.46%)   | 169/5820 (2.9%)    | 0.0390807512 |
| Urc2p  | 30/426 (7.04%)   | 302/5820 (5.19%)   | 0.0511699752 |
| Hog1p  | 22/426 (5.16%)   | 211/5820 (3.63%)   | 0.0567856633 |
| Rsc30p | 12/426 (2.82%)   | 102/5820 (1.75%)   | 0.0678272602 |
| Upc2p  | 30/426 (7.04%)   | 314/5820 (5.4%)    | 0.0770465994 |
| Jhd1p  | 12/426 (2.82%)   | 105/5820 (1.8%)    | 0.0806781452 |
| Asg1p  | 25/426 (5.87%)   | 256/5820 (4.4%)    | 0.0826002431 |
| Hap2p  | 131/426 (30.75%) | 1614/5820 (27.73%) | 0.0832479101 |
| Xbp1p  | 62/426 (14.55%)  | 716/5820 (12.3%)   | 0.0839157308 |
| Hst3p  | 16/426 (3.76%)   | 151/5820 (2.59%)   | 0.0845192626 |
| Sum1p  | 54/426 (12.68%)  | 615/5820 (10.57%)  | 0.0847375331 |
| Ume6p  | 74/426 (17.37%)  | 872/5820 (14.98%)  | 0.0880126688 |

|         |                  |                    |              |
|---------|------------------|--------------------|--------------|
| Kar4p   | 73/426 (17.14%)  | 860/5820 (14.78%)  | 0.0894938099 |
| Arg82p  | 15/426 (3.52%)   | 142/5820 (2.44%)   | 0.0946409076 |
| Hda1p   | 37/426 (8.69%)   | 407/5820 (6.99%)   | 0.0953562014 |
| YNR063W | 7/426 (1.64%)    | 54/5820 (0.93%)    | 0.0968103743 |
| Gal3p   | 10/426 (2.35%)   | 88/5820 (1.51%)    | 0.107753877  |
| Sfp1p   | 328/426 (77%)    | 4335/5820 (74.48%) | 0.1189173417 |
| Ask10p  | 15/426 (3.52%)   | 148/5820 (2.54%)   | 0.122794826  |
| Hir3p   | 36/426 (8.45%)   | 405/5820 (6.96%)   | 0.1247576092 |
| Reb1p   | 83/426 (19.48%)  | 1013/5820 (17.41%) | 0.1343105478 |
| Hpa2p   | 7/426 (1.64%)    | 59/5820 (1.01%)    | 0.1375423395 |
| Snf1p   | 25/426 (5.87%)   | 272/5820 (4.67%)   | 0.1377399066 |
| Met32p  | 47/426 (11.03%)  | 549/5820 (9.43%)   | 0.1390368096 |
| Aft2p   | 42/426 (9.86%)   | 486/5820 (8.35%)   | 0.1410372857 |
| Ure2p   | 1/426 (0.23%)    | 2/5820 (0.03%)     | 0.1410457743 |
| Yap5p   | 72/426 (16.9%)   | 874/5820 (15.02%)  | 0.1447964813 |
| Put3p   | 55/426 (12.91%)  | 658/5820 (11.31%)  | 0.1568771364 |
| Tho2p   | 8/426 (1.88%)    | 73/5820 (1.25%)    | 0.1627151954 |
| Uga3p   | 28/426 (6.57%)   | 317/5820 (5.45%)   | 0.1694269742 |
| Met31p  | 35/426 (8.22%)   | 407/5820 (6.99%)   | 0.1753536873 |
| Msn1p   | 25/426 (5.87%)   | 286/5820 (4.91%)   | 0.2004447367 |
| Tos8p   | 34/426 (7.98%)   | 407/5820 (6.99%)   | 0.2286505221 |
| Dal81p  | 31/426 (7.28%)   | 369/5820 (6.34%)   | 0.2316703102 |
| Stb3p   | 4/426 (0.94%)    | 34/5820 (0.58%)    | 0.2352808164 |
| Mss11p  | 49/426 (11.5%)   | 605/5820 (10.4%)   | 0.2404363741 |
| Pog1p   | 9/426 (2.11%)    | 94/5820 (1.62%)    | 0.2485648537 |
| Sas4p   | 12/426 (2.82%)   | 131/5820 (2.25%)   | 0.2496956411 |
| Ace2p   | 355/426 (83.33%) | 4775/5820 (82.04%) | 0.2587095153 |

|        |                  |                    |              |
|--------|------------------|--------------------|--------------|
| Zds1p  | 32/426 (7.51%)   | 388/5820 (6.67%)   | 0.2609063906 |
| Hal9p  | 23/426 (5.4%)    | 272/5820 (4.67%)   | 0.2621551474 |
| Elp6p  | 1/426 (0.23%)    | 4/5820 (0.07%)     | 0.2622377061 |
| lme1p  | 11/426 (2.58%)   | 122/5820 (2.1%)    | 0.2793248066 |
| Rtg1p  | 23/426 (5.4%)    | 277/5820 (4.76%)   | 0.2919269543 |
| Mot2p  | 11/426 (2.58%)   | 124/5820 (2.13%)   | 0.2974256117 |
| Rap1p  | 225/426 (52.82%) | 2997/5820 (51.49%) | 0.3027858186 |
| Tis11p | 26/426 (6.1%)    | 319/5820 (5.48%)   | 0.3095879159 |
| Yap1p  | 222/426 (52.11%) | 2959/5820 (50.84%) | 0.3105195124 |
| Snf11p | 15/426 (3.52%)   | 177/5820 (3.04%)   | 0.314354697  |
| Mal33p | 50/426 (11.74%)  | 639/5820 (10.98%)  | 0.3251172745 |
| Mds3p  | 4/426 (0.94%)    | 40/5820 (0.69%)    | 0.3357510854 |
| lxr1p  | 131/426 (30.75%) | 1732/5820 (29.76%) | 0.3389910033 |
| Ino4p  | 64/426 (15.02%)  | 832/5820 (14.3%)   | 0.3495817685 |
| Bdf2p  | 31/426 (7.28%)   | 396/5820 (6.8%)    | 0.3726443421 |
| Usv1p  | 11/426 (2.58%)   | 133/5820 (2.29%)   | 0.3819971853 |
| Snf5p  | 103/426 (24.18%) | 1373/5820 (23.59%) | 0.4029650097 |
| Swi3p  | 136/426 (31.92%) | 1821/5820 (31.29%) | 0.4031059926 |
| Met28p | 18/426 (4.23%)   | 229/5820 (3.93%)   | 0.4114852041 |
| Rgt2p  | 1/426 (0.23%)    | 7/5820 (0.12%)     | 0.4127921582 |
| Rtg2p  | 1/426 (0.23%)    | 7/5820 (0.12%)     | 0.4127921582 |
| Rpd3p  | 8/426 (1.88%)    | 98/5820 (1.68%)    | 0.4281308799 |
| Ada2p  | 11/426 (2.58%)   | 139/5820 (2.39%)   | 0.4396849216 |
| Rph1p  | 35/426 (8.22%)   | 463/5820 (7.96%)   | 0.4461210553 |
| Hcm1p  | 32/426 (7.51%)   | 424/5820 (7.29%)   | 0.4548563269 |
| Dot6p  | 12/426 (2.82%)   | 159/5820 (2.73%)   | 0.500255755  |
| Gat1p  | 16/426 (3.76%)   | 214/5820 (3.68%)   | 0.5033052089 |



|        |                  |                    |              |
|--------|------------------|--------------------|--------------|
| Tda9p  | 16/426 (3.76%)   | 214/5820 (3.68%)   | 0.5033052089 |
| Dal80p | 15/426 (3.52%)   | 201/5820 (3.45%)   | 0.5086648515 |
| Hat1p  | 4/426 (0.94%)    | 51/5820 (0.88%)    | 0.519123061  |
| Fzf1p  | 15/426 (3.52%)   | 203/5820 (3.49%)   | 0.5247003792 |
| Pdr3p  | 86/426 (20.19%)  | 1177/5820 (20.22%) | 0.5283197705 |
| Snt2p  | 10/426 (2.35%)   | 135/5820 (2.32%)   | 0.5326571097 |
| Rtf1p  | 33/426 (7.75%)   | 453/5820 (7.78%)   | 0.5402809853 |
| Eds1p  | 10/426 (2.35%)   | 136/5820 (2.34%)   | 0.542326989  |
| Cat8p  | 16/426 (3.76%)   | 223/5820 (3.83%)   | 0.5722959715 |
| Mig2p  | 22/426 (5.16%)   | 307/5820 (5.27%)   | 0.5757143842 |
| Yap7p  | 48/426 (11.27%)  | 667/5820 (11.46%)  | 0.5761602743 |
| Ngg1p  | 5/426 (1.17%)    | 69/5820 (1.19%)    | 0.5763393607 |
| Pho23p | 9/426 (2.11%)    | 126/5820 (2.16%)   | 0.5809762621 |
| Tbf1p  | 36/426 (8.45%)   | 505/5820 (8.68%)   | 0.5955681228 |
| Nut1p  | 19/426 (4.46%)   | 269/5820 (4.62%)   | 0.6010908719 |
| Hms2p  | 8/426 (1.88%)    | 114/5820 (1.96%)   | 0.6025490994 |
| Ert1p  | 14/426 (3.29%)   | 199/5820 (3.42%)   | 0.6029078855 |
| Sip4p  | 17/426 (3.99%)   | 242/5820 (4.16%)   | 0.6085100707 |
| Aca1p  | 20/426 (4.69%)   | 285/5820 (4.9%)    | 0.6140519694 |
| Tec1p  | 277/426 (65.02%) | 3818/5820 (65.6%)  | 0.624750126  |
| Wtm1p  | 13/426 (3.05%)   | 188/5820 (3.23%)   | 0.6273905121 |
| Leu3p  | 47/426 (11.03%)  | 665/5820 (11.43%)  | 0.6287740153 |
| Nsi1p  | 6/426 (1.41%)    | 88/5820 (1.51%)    | 0.632057141  |
| Hir2p  | 21/426 (4.93%)   | 303/5820 (5.21%)   | 0.6387008725 |
| Stb6p  | 6/426 (1.41%)    | 89/5820 (1.53%)    | 0.6430951237 |
| Ste12p | 279/426 (65.49%) | 3852/5820 (66.19%) | 0.6447769285 |
| Pdr8p  | 4/426 (0.94%)    | 60/5820 (1.03%)    | 0.6496134519 |

|         |                 |                    |              |
|---------|-----------------|--------------------|--------------|
| YKL222C | 4/426 (0.94%)   | 60/5820 (1.03%)    | 0.6496134519 |
| Stb1p   | 26/426 (6.1%)   | 376/5820 (6.46%)   | 0.6526375    |
| Hir1p   | 22/426 (5.16%)  | 320/5820 (5.5%)    | 0.6558184436 |
| Ppr1p   | 13/426 (3.05%)  | 192/5820 (3.3%)    | 0.6578344257 |
| Cse2p   | 54/426 (12.68%) | 776/5820 (13.33%)  | 0.6831852172 |
| Aro80p  | 29/426 (6.81%)  | 428/5820 (7.35%)   | 0.701414903  |
| lsw1p   | 29/426 (6.81%)  | 428/5820 (7.35%)   | 0.701414903  |
| Met18p  | 16/426 (3.76%)  | 242/5820 (4.16%)   | 0.703589398  |
| Srb5p   | 3/426 (0.7%)    | 49/5820 (0.84%)    | 0.7067663359 |
| Hat2p   | 33/426 (7.75%)  | 487/5820 (8.37%)   | 0.7112735817 |
| Yrr1p   | 49/426 (11.5%)  | 718/5820 (12.34%)  | 0.7291581592 |
| Sas5p   | 21/426 (4.93%)  | 321/5820 (5.52%)   | 0.7403623636 |
| Ecm22p  | 35/426 (8.22%)  | 526/5820 (9.04%)   | 0.7554694262 |
| Gal80p  | 5/426 (1.17%)   | 85/5820 (1.46%)    | 0.755963436  |
| Rim101p | 52/426 (12.21%) | 771/5820 (13.25%)  | 0.7658426736 |
| Pip2p   | 90/426 (21.13%) | 1306/5820 (22.44%) | 0.7675244722 |
| Pop2p   | 11/426 (2.58%)  | 179/5820 (3.08%)   | 0.7709067611 |
| Not3p   | 15/426 (3.52%)  | 239/5820 (4.11%)   | 0.7719239243 |
| Rif2p   | 4/426 (0.94%)   | 73/5820 (1.25%)    | 0.7924211197 |
| Hms1p   | 67/426 (15.73%) | 993/5820 (17.06%)  | 0.7948380533 |
| Esc2p   | 43/426 (10.09%) | 652/5820 (11.2%)   | 0.7962298431 |
| Srd1p   | 3/426 (0.7%)    | 57/5820 (0.98%)    | 0.7984386197 |
| Dot5p   | 6/426 (1.41%)   | 106/5820 (1.82%)   | 0.7985889292 |
| Dal82p  | 54/426 (12.68%) | 812/5820 (13.95%)  | 0.8046421758 |
| Fkh2p   | 46/426 (10.8%)  | 698/5820 (11.99%)  | 0.8056534611 |
| Sfl1p   | 8/426 (1.88%)   | 140/5820 (2.41%)   | 0.8147404527 |
| Caf4p   | 11/426 (2.58%)  | 189/5820 (3.25%)   | 0.8274488411 |

|         |                  |                    |              |
|---------|------------------|--------------------|--------------|
| Nnf2p   | 18/426 (4.23%)   | 298/5820 (5.12%)   | 0.8376637848 |
| Smp1p   | 17/426 (3.99%)   | 284/5820 (4.88%)   | 0.8420697197 |
| Rsc2p   | 48/426 (11.27%)  | 741/5820 (12.73%)  | 0.8457358245 |
| Mth1p   | 21/426 (4.93%)   | 346/5820 (5.95%)   | 0.8484364762 |
| Set2p   | 20/426 (4.69%)   | 331/5820 (5.69%)   | 0.8485352743 |
| Spt3p   | 82/426 (19.25%)  | 1230/5820 (21.13%) | 0.85380839   |
| Ash1p   | 223/426 (52.35%) | 3188/5820 (54.78%) | 0.8636180769 |
| Rco1p   | 28/426 (6.57%)   | 469/5820 (8.06%)   | 0.8993684544 |
| Cst6p   | 185/426 (43.43%) | 2695/5820 (46.31%) | 0.9013017238 |
| Rsf2p   | 25/426 (5.87%)   | 433/5820 (7.44%)   | 0.9198697368 |
| Hfi1p   | 94/426 (22.07%)  | 1444/5820 (24.81%) | 0.9236656054 |
| Cha4p   | 11/426 (2.58%)   | 217/5820 (3.73%)   | 0.930047113  |
| Rdr1p   | 12/426 (2.82%)   | 234/5820 (4.02%)   | 0.9314904026 |
| Dat1p   | 12/426 (2.82%)   | 235/5820 (4.04%)   | 0.9337797401 |
| Cdc73p  | 48/426 (11.27%)  | 789/5820 (13.56%)  | 0.9368418681 |
| Sds3p   | 37/426 (8.69%)   | 625/5820 (10.74%)  | 0.936888881  |
| YJL206C | 8/426 (1.88%)    | 172/5820 (2.96%)   | 0.9428943419 |
| Hst1p   | 11/426 (2.58%)   | 228/5820 (3.92%)   | 0.9528507734 |
| Spt20p  | 126/426 (29.58%) | 1937/5820 (33.28%) | 0.9599414273 |
| Yap3p   | 17/426 (3.99%)   | 333/5820 (5.72%)   | 0.9616032761 |
| Thi2p   | 47/426 (11.03%)  | 798/5820 (13.71%)  | 0.962238955  |
| Sir3p   | 51/426 (11.97%)  | 863/5820 (14.83%)  | 0.9663208213 |
| Plm2p   | 8/426 (1.88%)    | 185/5820 (3.18%)   | 0.9666862042 |
| Mal13p  | 2/426 (0.47%)    | 69/5820 (1.19%)    | 0.9667027721 |
| Rif1p   | 18/426 (4.23%)   | 358/5820 (6.15%)   | 0.9710824891 |
| Gal11p  | 49/426 (11.5%)   | 841/5820 (14.45%)  | 0.9719195424 |
| Dig1p   | 19/426 (4.46%)   | 376/5820 (6.46%)   | 0.9726306508 |

|         |                  |                    |              |
|---------|------------------|--------------------|--------------|
| Hst4p   | 5/426 (1.17%)    | 134/5820 (2.3%)    | 0.9726454092 |
| Rtt107p | 27/426 (6.34%)   | 508/5820 (8.73%)   | 0.9755648605 |
| Sin3p   | 113/426 (26.53%) | 1782/5820 (30.62%) | 0.9759869086 |
| Sin4p   | 144/426 (33.8%)  | 2232/5820 (38.35%) | 0.9807480979 |
| Pib2p   | 18/426 (4.23%)   | 371/5820 (6.37%)   | 0.9813186112 |
| Hac1p   | 28/426 (6.57%)   | 535/5820 (9.19%)   | 0.9823840334 |
| Uls1p   | 38/426 (8.92%)   | 700/5820 (12.03%)  | 0.9858658074 |
| Stb4p   | 2/426 (0.47%)    | 85/5820 (1.46%)    | 0.9883617965 |
| Sas3p   | 69/426 (16.2%)   | 1183/5820 (20.33%) | 0.989593299  |
| Snf2p   | 130/426 (30.52%) | 2081/5820 (35.76%) | 0.99222252   |
| Gal4p   | 70/426 (16.43%)  | 1213/5820 (20.84%) | 0.9927463758 |
| Arg81p  | 15/426 (3.52%)   | 349/5820 (6%)      | 0.993671885  |
| Taf14p  | 49/426 (11.5%)   | 909/5820 (15.62%)  | 0.9950994704 |
| Pgd1p   | 20/426 (4.69%)   | 444/5820 (7.63%)   | 0.9954625847 |
| Sir1p   | 12/426 (2.82%)   | 307/5820 (5.27%)   | 0.9961356709 |
| Rlf2p   | 44/426 (10.33%)  | 840/5820 (14.43%)  | 0.9962216434 |
| Otu1p   | 13/426 (3.05%)   | 328/5820 (5.64%)   | 0.9965728194 |
| Gts1p   | 22/426 (5.16%)   | 504/5820 (8.66%)   | 0.9982975536 |
| Sef1p   | 8/426 (1.88%)    | 252/5820 (4.33%)   | 0.9986351407 |
| Tye7p   | 67/426 (15.73%)  | 1237/5820 (21.25%) | 0.9988493922 |
| Cup9p   | 57/426 (13.38%)  | 1085/5820 (18.64%) | 0.9989175848 |
| Ndt80p  | 25/426 (5.87%)   | 568/5820 (9.76%)   | 0.9989489823 |
| Gln3p   | 63/426 (14.79%)  | 1180/5820 (20.27%) | 0.9989860613 |
| Tos4p   | 5/426 (1.17%)    | 202/5820 (3.47%)   | 0.9993692655 |
| lfn1p   | 20/426 (4.69%)   | 498/5820 (8.56%)   | 0.999477691  |
| Sir2p   | 82/426 (19.25%)  | 1493/5820 (25.65%) | 0.9994947516 |
| Sps18p  | 9/426 (2.11%)    | 303/5820 (5.21%)   | 0.9997283558 |

|        |                  |                    |              |
|--------|------------------|--------------------|--------------|
| Met4p  | 83/426 (19.48%)  | 1548/5820 (26.6%)  | 0.9998471164 |
| Spt4p  | 75/426 (17.61%)  | 1428/5820 (24.54%) | 0.9998557229 |
| Srb2p  | 35/426 (8.22%)   | 808/5820 (13.88%)  | 0.9999305459 |
| Isw2p  | 58/426 (13.62%)  | 1204/5820 (20.69%) | 0.9999649037 |
| Snf6p  | 149/426 (34.98%) | 2640/5820 (45.36%) | 0.9999974977 |
| Tup1p  | 150/426 (35.21%) | 2660/5820 (45.7%)  | 0.9999979633 |
| Spt10p | 90/426 (21.13%)  | 1793/5820 (30.81%) | 0.9999986737 |

$$\alpha^{\text{BON}} = 1.73 \times 10^{-4}$$

### (B) TF enrichment in up-regulated genes in $\Delta\text{reg1}$

| Transcription factor | Sample frequency | Background frequency | p-value      |
|----------------------|------------------|----------------------|--------------|
| Sok2p                | 377/545 (69.17%) | 2255/5820 (38.75%)   | 1.258545E-51 |
| Bas1p                | 417/545 (76.51%) | 2755/5820 (47.34%)   | 3.088777E-48 |
| Gis1p                | 124/545 (22.75%) | 371/5820 (6.37%)     | 2.453851E-41 |
| Sut1p                | 126/545 (23.12%) | 417/5820 (7.16%)     | 8.501252E-37 |
| Adr1p                | 171/545 (31.38%) | 827/5820 (14.21%)    | 1.390543E-27 |
| Gat4p                | 71/545 (13.03%)  | 218/5820 (3.75%)     | 1.320528E-22 |
| Mig1p                | 108/545 (19.82%) | 449/5820 (7.71%)     | 4.048102E-22 |
| Rlm1p                | 143/545 (26.24%) | 711/5820 (12.22%)    | 2.499628E-21 |
| Hap4p                | 162/545 (29.72%) | 881/5820 (15.14%)    | 4.218436E-20 |
| Aft1p                | 220/545 (40.37%) | 1385/5820 (23.8%)    | 1.099161E-19 |
| Mig2p                | 80/545 (14.68%)  | 307/5820 (5.27%)     | 1.347455E-18 |
| Msn4p                | 335/545 (61.47%) | 2565/5820 (44.07%)   | 7.999823E-18 |
| Msn2p                | 408/545 (74.86%) | 3411/5820 (58.61%)   | 6.901548E-17 |
| Gcn4p                | 366/545 (67.16%) | 2994/5820 (51.44%)   | 4.833578E-15 |
| Zap1p                | 221/545 (40.55%) | 1530/5820 (26.29%)   | 1.631607E-14 |
| Nrg2p                | 77/545 (14.13%)  | 346/5820 (5.95%)     | 8.499399E-14 |
| Pho2p                | 167/545 (30.64%) | 1075/5820 (18.47%)   | 3.006441E-13 |
| Nrg1p                | 125/545 (22.94%) | 720/5820 (12.37%)    | 3.254861E-13 |

|         |                  |                    |              |
|---------|------------------|--------------------|--------------|
| Cin5p   | 282/545 (51.74%) | 2180/5820 (37.46%) | 7.133909E-13 |
| Swi5p   | 257/545 (47.16%) | 1944/5820 (33.4%)  | 1.890902E-12 |
| Gcr2p   | 188/545 (34.5%)  | 1308/5820 (22.47%) | 1.008422E-11 |
| Hsf1p   | 232/545 (42.57%) | 1726/5820 (29.66%) | 1.132384E-11 |
| Mig3p   | 226/545 (41.47%) | 1669/5820 (28.68%) | 1.213543E-11 |
| Rgm1p   | 78/545 (14.31%)  | 395/5820 (6.79%)   | 3.977915E-11 |
| Hap1p   | 68/545 (12.48%)  | 328/5820 (5.64%)   | 8.927637E-11 |
| Rme1p   | 79/545 (14.5%)   | 416/5820 (7.15%)   | 2.20734E-10  |
| Sfp1p   | 463/545 (84.95%) | 4335/5820 (74.48%) | 4.40641E-10  |
| YPR015C | 38/545 (6.97%)   | 138/5820 (2.37%)   | 4.453082E-10 |
| Cat8p   | 51/545 (9.36%)   | 223/5820 (3.83%)   | 6.944429E-10 |
| Mot3p   | 99/545 (18.17%)  | 586/5820 (10.07%)  | 8.678496E-10 |
| Oaf1p   | 135/545 (24.77%) | 891/5820 (15.31%)  | 8.958176E-10 |
| Rds2p   | 92/545 (16.88%)  | 561/5820 (9.64%)   | 1.8315563E-8 |
| Rpn4p   | 225/545 (41.28%) | 1783/5820 (30.64%) | 2.0164354E-8 |
| Xbp1p   | 110/545 (20.18%) | 716/5820 (12.3%)   | 2.4365651E-8 |
| Hap3p   | 58/545 (10.64%)  | 303/5820 (5.21%)   | 5.3596402E-8 |
| Rgt2p   | 7/545 (1.28%)    | 7/5820 (0.12%)     | 6.0965065E-8 |
| Skn7p   | 132/545 (24.22%) | 922/5820 (15.84%)  | 6.1321048E-8 |
| Hap5p   | 75/545 (13.76%)  | 447/5820 (7.68%)   | 1.8237249E-7 |
| Oaf3p   | 69/545 (12.66%)  | 416/5820 (7.15%)   | 9.3800047E-7 |
| Cad1p   | 113/545 (20.73%) | 794/5820 (13.64%)  | 1.0232711E-6 |
| Hot1p   | 22/545 (4.04%)   | 77/5820 (1.32%)    | 1.142627E-6  |
| Fhl1p   | 160/545 (29.36%) | 1241/5820 (21.32%) | 2.1098271E-6 |
| Sko1p   | 126/545 (23.12%) | 925/5820 (15.89%)  | 2.33942E-6   |
| Ric1p   | 95/545 (17.43%)  | 648/5820 (11.13%)  | 2.4792813E-6 |
| Ume6p   | 120/545 (22.02%) | 872/5820 (14.98%)  | 2.6044797E-6 |
| Flo8p   | 91/545 (16.7%)   | 618/5820 (10.62%)  | 3.4934756E-6 |
| Rox1p   | 121/545 (22.2%)  | 900/5820 (15.46%)  | 7.8037583E-6 |
| Arr1p   | 194/545 (35.6%)  | 1601/5820 (27.51%) | 8.7244081E-6 |
| Yrm1p   | 292/545 (53.58%) | 2605/5820 (44.76%) | 8.9067466E-6 |

|        |                  |                    |              |
|--------|------------------|--------------------|--------------|
| Opi1p  | 61/545 (11.19%)  | 379/5820 (6.51%)   | 0.0000115208 |
| Pdr1p  | 175/545 (32.11%) | 1438/5820 (24.71%) | 0.000024936  |
| Yox1p  | 170/545 (31.19%) | 1428/5820 (24.54%) | 0.0001264007 |
| Rtg1p  | 45/545 (8.26%)   | 277/5820 (4.76%)   | 0.0001379531 |
| Cup2p  | 80/545 (14.68%)  | 578/5820 (9.93%)   | 0.0001395699 |
| Gcr1p  | 189/545 (34.68%) | 1630/5820 (28.01%) | 0.0002067642 |
| Yhp1p  | 154/545 (28.26%) | 1287/5820 (22.11%) | 0.000240333  |
| Spt23p | 208/545 (38.17%) | 1827/5820 (31.39%) | 0.0002490707 |
| Cac2p  | 89/545 (16.33%)  | 672/5820 (11.55%)  | 0.0002780733 |
| Mga2p  | 134/545 (24.59%) | 1107/5820 (19.02%) | 0.0004332702 |
| Yap6p  | 120/545 (22.02%) | 975/5820 (16.75%)  | 0.0004871787 |
| Sut2p  | 30/545 (5.5%)    | 174/5820 (2.99%)   | 0.0006644572 |
| Rtg3p  | 87/545 (15.96%)  | 671/5820 (11.53%)  | 0.0006697977 |
| Azf1p  | 33/545 (6.06%)   | 198/5820 (3.4%)    | 0.0006779159 |
| Crz1p  | 68/545 (12.48%)  | 500/5820 (8.59%)   | 0.0007637184 |
| Met32p | 73/545 (13.39%)  | 549/5820 (9.43%)   | 0.0009341692 |
| Aft2p  | 66/545 (12.11%)  | 486/5820 (8.35%)   | 0.0009532462 |
| Hda1p  | 57/545 (10.46%)  | 407/5820 (6.99%)   | 0.001025266  |
| Snf1p  | 41/545 (7.52%)   | 272/5820 (4.67%)   | 0.0013014077 |
| Stp2p  | 82/545 (15.05%)  | 643/5820 (11.05%)  | 0.0016053517 |
| Gzf3p  | 42/545 (7.71%)   | 288/5820 (4.95%)   | 0.0021901968 |
| Rgt1p  | 65/545 (11.93%)  | 496/5820 (8.52%)   | 0.0025995804 |
| Hmo1p  | 119/545 (21.83%) | 1010/5820 (17.35%) | 0.0027525649 |
| Arg82p | 24/545 (4.4%)    | 142/5820 (2.44%)   | 0.0029394906 |
| Hir3p  | 54/545 (9.91%)   | 405/5820 (6.96%)   | 0.0041483603 |
| Rsc30p | 18/545 (3.3%)    | 102/5820 (1.75%)   | 0.0059525183 |
| Mga1p  | 85/545 (15.6%)   | 703/5820 (12.08%)  | 0.0060859842 |
| Ssn3p  | 16/545 (2.94%)   | 87/5820 (1.49%)    | 0.0061696882 |
| Rph1p  | 59/545 (10.83%)  | 463/5820 (7.96%)   | 0.0075270931 |
| Mac1p  | 59/545 (10.83%)  | 465/5820 (7.99%)   | 0.0082412261 |
| Rfx1p  | 84/545 (15.41%)  | 703/5820 (12.08%)  | 0.0087178264 |

|         |                  |                    |              |
|---------|------------------|--------------------|--------------|
| Cyc8p   | 2/545 (0.37%)    | 2/5820 (0.03%)     | 0.0087543531 |
| Gat3p   | 56/545 (10.28%)  | 446/5820 (7.66%)   | 0.0122381563 |
| Wtm2p   | 25/545 (4.59%)   | 168/5820 (2.89%)   | 0.0127952468 |
| Sin3p   | 190/545 (34.86%) | 1782/5820 (30.62%) | 0.0142316082 |
| Ste12p  | 384/545 (70.46%) | 3852/5820 (66.19%) | 0.0144674726 |
| Eds1p   | 21/545 (3.85%)   | 136/5820 (2.34%)   | 0.0145353902 |
| Sip3p   | 12/545 (2.2%)    | 65/5820 (1.12%)    | 0.0160910073 |
| Ace2p   | 465/545 (85.32%) | 4775/5820 (82.04%) | 0.0192272955 |
| Yap5p   | 99/545 (18.17%)  | 874/5820 (15.02%)  | 0.0196468802 |
| YER184C | 29/545 (5.32%)   | 210/5820 (3.61%)   | 0.0205084819 |
| Arg80p  | 49/545 (8.99%)   | 395/5820 (6.79%)   | 0.0227267269 |
| Hel2p   | 28/545 (5.14%)   | 203/5820 (3.49%)   | 0.0228792158 |
| Tbs1p   | 16/545 (2.94%)   | 102/5820 (1.75%)   | 0.0267233573 |
| Mbp1p   | 79/545 (14.5%)   | 691/5820 (11.87%)  | 0.0297885956 |
| Ecm22p  | 62/545 (11.38%)  | 526/5820 (9.04%)   | 0.0300649371 |
| Ino2p   | 52/545 (9.54%)   | 431/5820 (7.41%)   | 0.0308895228 |
| Swi4p   | 116/545 (21.28%) | 1067/5820 (18.33%) | 0.0366390669 |
| Yap1p   | 297/545 (54.5%)  | 2959/5820 (50.84%) | 0.0402394149 |
| Ixr1p   | 180/545 (33.03%) | 1732/5820 (29.76%) | 0.0451276454 |
| Ngg1p   | 11/545 (2.02%)   | 69/5820 (1.19%)    | 0.0542441019 |
| Phd1p   | 84/545 (15.41%)  | 763/5820 (13.11%)  | 0.0562208914 |
| Upc2p   | 38/545 (6.97%)   | 314/5820 (5.4%)    | 0.0571466088 |
| Rsc1p   | 76/545 (13.95%)  | 687/5820 (11.8%)   | 0.0619450282 |
| Hst4p   | 18/545 (3.3%)    | 134/5820 (2.3%)    | 0.0737731098 |
| Swi3p   | 186/545 (34.13%) | 1821/5820 (31.29%) | 0.0737788639 |
| Asg1p   | 31/545 (5.69%)   | 256/5820 (4.4%)    | 0.0795512262 |
| Srb5p   | 8/545 (1.47%)    | 49/5820 (0.84%)    | 0.0828683879 |
| Dal80p  | 25/545 (4.59%)   | 201/5820 (3.45%)   | 0.084647786  |
| Cst6p   | 268/545 (49.17%) | 2695/5820 (46.31%) | 0.0861426176 |
| Tod6p   | 12/545 (2.2%)    | 84/5820 (1.44%)    | 0.0903508848 |
| Stb3p   | 6/545 (1.1%)     | 34/5820 (0.58%)    | 0.0927120481 |



|         |                  |                    |              |
|---------|------------------|--------------------|--------------|
| Rds1p   | 31/545 (5.69%)   | 260/5820 (4.47%)   | 0.0930651023 |
| Snf7p   | 1/545 (0.18%)    | 1/5820 (0.02%)     | 0.0936426117 |
| Stb5p   | 121/545 (22.2%)  | 1162/5820 (19.97%) | 0.0952178383 |
| Ask10p  | 19/545 (3.49%)   | 148/5820 (2.54%)   | 0.0960576255 |
| YFL052W | 12/545 (2.2%)    | 85/5820 (1.46%)    | 0.0967603088 |
| Fkh1p   | 86/545 (15.78%)  | 807/5820 (13.87%)  | 0.0993778316 |
| Sfl1p   | 18/545 (3.3%)    | 140/5820 (2.41%)   | 0.1021007289 |
| Pdr3p   | 122/545 (22.39%) | 1177/5820 (20.22%) | 0.1040382308 |
| Wtm1p   | 23/545 (4.22%)   | 188/5820 (3.23%)   | 0.1090438631 |
| Ert1p   | 24/545 (4.4%)    | 199/5820 (3.42%)   | 0.1163291527 |
| Smk1p   | 15/545 (2.75%)   | 115/5820 (1.98%)   | 0.1165445333 |
| Gal3p   | 12/545 (2.2%)    | 88/5820 (1.51%)    | 0.117595536  |
| Snt2p   | 17/545 (3.12%)   | 135/5820 (2.32%)   | 0.1262328747 |
| Pho4p   | 143/545 (26.24%) | 1406/5820 (24.16%) | 0.1277097607 |
| Rpi1p   | 21/545 (3.85%)   | 173/5820 (2.97%)   | 0.1288200208 |
| Put3p   | 70/545 (12.84%)  | 658/5820 (11.31%)  | 0.1320244847 |
| YER130C | 21/545 (3.85%)   | 174/5820 (2.99%)   | 0.1343771942 |
| Ino4p   | 87/545 (15.96%)  | 832/5820 (14.3%)   | 0.1352814304 |
| Tda9p   | 25/545 (4.59%)   | 214/5820 (3.68%)   | 0.1436550069 |
| YPR196W | 20/545 (3.67%)   | 167/5820 (2.87%)   | 0.1491780641 |
| Dot6p   | 19/545 (3.49%)   | 159/5820 (2.73%)   | 0.1589753101 |
| Mds3p   | 6/545 (1.1%)     | 40/5820 (0.69%)    | 0.166554957  |
| Not3p   | 27/545 (4.95%)   | 239/5820 (4.11%)   | 0.1740009249 |
| Swi6p   | 78/545 (14.31%)  | 754/5820 (12.96%)  | 0.1772822616 |
| Abf1p   | 274/545 (50.28%) | 2811/5820 (48.3%)  | 0.1775335231 |
| Ure2p   | 1/545 (0.18%)    | 2/5820 (0.03%)     | 0.1785308703 |
| Ssn2p   | 34/545 (6.24%)   | 309/5820 (5.31%)   | 0.1786750101 |
| Cbf1p   | 152/545 (27.89%) | 1523/5820 (26.17%) | 0.1813090556 |
| Hog1p   | 24/545 (4.4%)    | 211/5820 (3.63%)   | 0.1821703499 |
| Hpa2p   | 8/545 (1.47%)    | 59/5820 (1.01%)    | 0.1832981077 |
| Pdr8p   | 8/545 (1.47%)    | 60/5820 (1.03%)    | 0.1954570115 |

|         |                  |                   |              |
|---------|------------------|-------------------|--------------|
| Tec1p   | 367/545 (67.34%) | 3818/5820 (65.6%) | 0.1980220733 |
| Stp4p   | 20/545 (3.67%)   | 176/5820 (3.02%)  | 0.2100989369 |
| YPR022C | 14/545 (2.57%)   | 121/5820 (2.08%)  | 0.2400668128 |
| Set2p   | 35/545 (6.42%)   | 331/5820 (5.69%)  | 0.2440531932 |
| Sip4p   | 26/545 (4.77%)   | 242/5820 (4.16%)  | 0.2558228683 |
| Kar4p   | 86/545 (15.78%)  | 860/5820 (14.78%) | 0.2620426433 |
| YGR067C | 20/545 (3.67%)   | 183/5820 (3.14%)  | 0.2643875896 |
| Stb1p   | 39/545 (7.16%)   | 376/5820 (6.46%)  | 0.268971335  |
| Sum1p   | 62/545 (11.38%)  | 615/5820 (10.57%) | 0.2800527177 |
| Vms1p   | 20/545 (3.67%)   | 185/5820 (3.18%)  | 0.2808243329 |
| War1p   | 10/545 (1.83%)   | 87/5820 (1.49%)   | 0.2952924959 |
| Snf11p  | 19/545 (3.49%)   | 177/5820 (3.04%)  | 0.2983574042 |
| Stb6p   | 10/545 (1.83%)   | 89/5820 (1.53%)   | 0.3204050764 |
| Elp6p   | 1/545 (0.18%)    | 4/5820 (0.07%)    | 0.3252364106 |
| Dal81p  | 37/545 (6.79%)   | 369/5820 (6.34%)  | 0.3526504768 |
| Usv1p   | 14/545 (2.57%)   | 133/5820 (2.29%)  | 0.3632858884 |
| Mot2p   | 13/545 (2.39%)   | 124/5820 (2.13%)  | 0.3767750015 |
| Nut1p   | 27/545 (4.95%)   | 269/5820 (4.62%)  | 0.3802212015 |
| Imp2'p  | 1/545 (0.18%)    | 5/5820 (0.09%)    | 0.3884664925 |
| Gsm1p   | 17/545 (3.12%)   | 169/5820 (2.9%)   | 0.4153676936 |
| Sif2p   | 42/545 (7.71%)   | 432/5820 (7.42%)  | 0.4212430039 |
| Rsf2p   | 42/545 (7.71%)   | 433/5820 (7.44%)  | 0.4275719808 |
| Bye1p   | 15/545 (2.75%)   | 150/5820 (2.58%)  | 0.4345685729 |
| Ppr1p   | 19/545 (3.49%)   | 192/5820 (3.3%)   | 0.4354549547 |
| Yap7p   | 64/545 (11.74%)  | 667/5820 (11.46%) | 0.4359079353 |
| Dat1p   | 23/545 (4.22%)   | 235/5820 (4.04%)  | 0.4439191558 |
| Gat1p   | 21/545 (3.85%)   | 214/5820 (3.68%)  | 0.4444191652 |
| Msi1p   | 23/545 (4.22%)   | 236/5820 (4.06%)  | 0.4524267142 |
| Met31p  | 39/545 (7.16%)   | 407/5820 (6.99%)  | 0.4646046724 |
| Taf14p  | 86/545 (15.78%)  | 909/5820 (15.62%) | 0.4766831649 |
| Rim101p | 73/545 (13.39%)  | 771/5820 (13.25%) | 0.4787755919 |

|         |                  |                    |              |
|---------|------------------|--------------------|--------------|
| Pip2p   | 123/545 (22.57%) | 1306/5820 (22.44%) | 0.488065114  |
| Mbf1p   | 19/545 (3.49%)   | 198/5820 (3.4%)    | 0.4914912295 |
| Haa1p   | 63/545 (11.56%)  | 667/5820 (11.46%)  | 0.4918299406 |
| YKL222C | 6/545 (1.1%)     | 60/5820 (1.03%)    | 0.4969143828 |
| Rtg2p   | 1/545 (0.18%)    | 7/5820 (0.12%)     | 0.4977333696 |
| Srb2p   | 76/545 (13.95%)  | 808/5820 (13.88%)  | 0.5033840156 |
| Hms2p   | 11/545 (2.02%)   | 114/5820 (1.96%)   | 0.5056316032 |
| Hms1p   | 93/545 (17.06%)  | 993/5820 (17.06%)  | 0.5189795274 |
| Hir1p   | 30/545 (5.5%)    | 320/5820 (5.5%)    | 0.5271565158 |
| Tho2p   | 7/545 (1.28%)    | 73/5820 (1.25%)    | 0.5325989039 |
| Stb2p   | 21/545 (3.85%)   | 224/5820 (3.85%)   | 0.5327189823 |
| Mcm1p   | 156/545 (28.62%) | 1670/5820 (28.69%) | 0.5327283142 |
| Rsc2p   | 69/545 (12.66%)  | 741/5820 (12.73%)  | 0.5424141716 |
| Sua7p   | 1/545 (0.18%)    | 8/5820 (0.14%)     | 0.5448235663 |
| Met28p  | 21/545 (3.85%)   | 229/5820 (3.93%)   | 0.5755629326 |
| YNR063W | 5/545 (0.92%)    | 54/5820 (0.93%)    | 0.579275115  |
| Kss1p   | 17/545 (3.12%)   | 186/5820 (3.2%)    | 0.5806127472 |
| Tbf1p   | 46/545 (8.44%)   | 505/5820 (8.68%)   | 0.6061917884 |
| Fzf1p   | 18/545 (3.3%)    | 203/5820 (3.49%)   | 0.6341473786 |
| Mal13p  | 6/545 (1.1%)     | 69/5820 (1.19%)    | 0.6371639366 |
| Hcm1p   | 38/545 (6.97%)   | 424/5820 (7.29%)   | 0.642169198  |
| Leu3p   | 60/545 (11.01%)  | 665/5820 (11.43%)  | 0.6478163422 |
| Hac1p   | 48/545 (8.81%)   | 535/5820 (9.19%)   | 0.6517729859 |
| Cha4p   | 19/545 (3.49%)   | 217/5820 (3.73%)   | 0.6581886242 |
| Jhd1p   | 9/545 (1.65%)    | 105/5820 (1.8%)    | 0.6604805203 |
| Smp1p   | 25/545 (4.59%)   | 284/5820 (4.88%)   | 0.6614211347 |
| Hst3p   | 13/545 (2.39%)   | 151/5820 (2.59%)   | 0.6681236351 |
| Srb8p   | 51/545 (9.36%)   | 572/5820 (9.83%)   | 0.6736147296 |
| Sas5p   | 28/545 (5.14%)   | 321/5820 (5.52%)   | 0.6866442815 |
| Sas4p   | 11/545 (2.02%)   | 131/5820 (2.25%)   | 0.6939412843 |
| Snf5p   | 124/545 (22.75%) | 1373/5820 (23.59%) | 0.7026256451 |

|         |                  |                    |              |
|---------|------------------|--------------------|--------------|
| Pdc2p   | 2/545 (0.37%)    | 26/5820 (0.45%)    | 0.7146597611 |
| Hat1p   | 4/545 (0.73%)    | 51/5820 (0.88%)    | 0.7166037938 |
| Dal82p  | 72/545 (13.21%)  | 812/5820 (13.95%)  | 0.719337451  |
| Yrr1p   | 63/545 (11.56%)  | 718/5820 (12.34%)  | 0.7388110057 |
| Spt2p   | 33/545 (6.06%)   | 386/5820 (6.63%)   | 0.7412017897 |
| Hat2p   | 42/545 (7.71%)   | 487/5820 (8.37%)   | 0.7442619233 |
| Msn1p   | 24/545 (4.4%)    | 286/5820 (4.91%)   | 0.7483583745 |
| Pho23p  | 10/545 (1.83%)   | 126/5820 (2.16%)   | 0.7550400083 |
| Plm2p   | 15/545 (2.75%)   | 185/5820 (3.18%)   | 0.7607023417 |
| Ada2p   | 11/545 (2.02%)   | 139/5820 (2.39%)   | 0.7655139843 |
| Mal33p  | 55/545 (10.09%)  | 639/5820 (10.98%)  | 0.7769495245 |
| Gln3p   | 104/545 (19.08%) | 1180/5820 (20.27%) | 0.782209928  |
| Rap1p   | 272/545 (49.91%) | 2997/5820 (51.49%) | 0.7949049532 |
| Hal9p   | 22/545 (4.04%)   | 272/5820 (4.67%)   | 0.7993429925 |
| Pop2p   | 14/545 (2.57%)   | 179/5820 (3.08%)   | 0.7999073029 |
| Aca1p   | 23/545 (4.22%)   | 285/5820 (4.9%)    | 0.8071641532 |
| Stp1p   | 61/545 (11.19%)  | 717/5820 (12.32%)  | 0.8177890216 |
| YLR278C | 35/545 (6.42%)   | 425/5820 (7.3%)    | 0.8194688482 |
| Ime1p   | 9/545 (1.65%)    | 122/5820 (2.1%)    | 0.8194795966 |
| Gal80p  | 6/545 (1.1%)     | 85/5820 (1.46%)    | 0.8204196153 |
| Nsi1p   | 6/545 (1.1%)     | 88/5820 (1.51%)    | 0.8449487822 |
| Mss11p  | 50/545 (9.17%)   | 605/5820 (10.4%)   | 0.8547251329 |
| Rco1p   | 38/545 (6.97%)   | 469/5820 (8.06%)   | 0.8563434714 |
| Ash1p   | 287/545 (52.66%) | 3188/5820 (54.78%) | 0.8616088458 |
| Aro80p  | 34/545 (6.24%)   | 428/5820 (7.35%)   | 0.8730445457 |
| Arg81p  | 27/545 (4.95%)   | 349/5820 (6%)      | 0.8812986715 |
| Reb1p   | 85/545 (15.6%)   | 1013/5820 (17.41%) | 0.89163169   |
| Cdc73p  | 65/545 (11.93%)  | 789/5820 (13.56%)  | 0.8926758139 |
| Zds1p   | 30/545 (5.5%)    | 388/5820 (6.67%)   | 0.8935137936 |
| lfh1p   | 39/545 (7.16%)   | 498/5820 (8.56%)   | 0.9070792575 |
| Rpd3p   | 6/545 (1.1%)     | 98/5820 (1.68%)    | 0.9077158118 |

|         |                  |                    |              |
|---------|------------------|--------------------|--------------|
| Hfi1p   | 123/545 (22.57%) | 1444/5820 (24.81%) | 0.9083766754 |
| Stb4p   | 5/545 (0.92%)    | 85/5820 (1.46%)    | 0.9106687418 |
| Rtf1p   | 35/545 (6.42%)   | 453/5820 (7.78%)   | 0.9110136242 |
| Caf4p   | 13/545 (2.39%)   | 189/5820 (3.25%)   | 0.9113675753 |
| Pib2p   | 28/545 (5.14%)   | 371/5820 (6.37%)   | 0.9120338768 |
| Srd1p   | 3/545 (0.55%)    | 57/5820 (0.98%)    | 0.9129708352 |
| Tos8p   | 31/545 (5.69%)   | 407/5820 (6.99%)   | 0.9134151018 |
| Rif2p   | 4/545 (0.73%)    | 73/5820 (1.25%)    | 0.9209812819 |
| Hir2p   | 22/545 (4.04%)   | 303/5820 (5.21%)   | 0.9221106965 |
| Met18p  | 17/545 (3.12%)   | 242/5820 (4.16%)   | 0.9222134307 |
| Sds3p   | 49/545 (8.99%)   | 625/5820 (10.74%)  | 0.9300969655 |
| Sef1p   | 17/545 (3.12%)   | 252/5820 (4.33%)   | 0.9471068435 |
| Pog1p   | 5/545 (0.92%)    | 94/5820 (1.62%)    | 0.9478186248 |
| Hst1p   | 15/545 (2.75%)   | 228/5820 (3.92%)   | 0.9497738773 |
| Tis11p  | 22/545 (4.04%)   | 319/5820 (5.48%)   | 0.9558147347 |
| Yap3p   | 23/545 (4.22%)   | 333/5820 (5.72%)   | 0.9583920561 |
| Rdr1p   | 15/545 (2.75%)   | 234/5820 (4.02%)   | 0.9611072041 |
| Dot5p   | 5/545 (0.92%)    | 106/5820 (1.82%)   | 0.9756382986 |
| Rtt107p | 36/545 (6.61%)   | 508/5820 (8.73%)   | 0.9761305185 |
| Dig1p   | 25/545 (4.59%)   | 376/5820 (6.46%)   | 0.9789773412 |
| Urc2p   | 19/545 (3.49%)   | 302/5820 (5.19%)   | 0.9808683264 |
| Sps18p  | 19/545 (3.49%)   | 303/5820 (5.21%)   | 0.9816774484 |
| Rts2p   | 1/545 (0.18%)    | 41/5820 (0.7%)     | 0.9825045259 |
| Rif2p   | 63/545 (11.56%)  | 840/5820 (14.43%)  | 0.9827558695 |
| Pgd1p   | 30/545 (5.5%)    | 444/5820 (7.63%)   | 0.9829969703 |
| YJL206C | 9/545 (1.65%)    | 172/5820 (2.96%)   | 0.9845928719 |
| Thi2p   | 59/545 (10.83%)  | 798/5820 (13.71%)  | 0.9851243285 |
| Spt3p   | 96/545 (17.61%)  | 1230/5820 (21.13%) | 0.9862435009 |
| Uls1p   | 50/545 (9.17%)   | 700/5820 (12.03%)  | 0.9888116307 |
| Cse2p   | 56/545 (10.28%)  | 776/5820 (13.33%)  | 0.9902127727 |
| Bdf2p   | 25/545 (4.59%)   | 396/5820 (6.8%)    | 0.9906253156 |

|        |                  |                    |              |
|--------|------------------|--------------------|--------------|
| Rif1p  | 22/545 (4.04%)   | 358/5820 (6.15%)   | 0.9909177624 |
| Tye7p  | 95/545 (17.43%)  | 1237/5820 (21.25%) | 0.9915617097 |
| Sir1p  | 18/545 (3.3%)    | 307/5820 (5.27%)   | 0.9915654257 |
| Fkh2p  | 49/545 (8.99%)   | 698/5820 (11.99%)  | 0.9919879886 |
| Sir3p  | 62/545 (11.38%)  | 863/5820 (14.83%)  | 0.9940249653 |
| Sin4p  | 181/545 (33.21%) | 2232/5820 (38.35%) | 0.9960710636 |
| Esc2p  | 43/545 (7.89%)   | 652/5820 (11.2%)   | 0.9970476705 |
| Uga3p  | 17/545 (3.12%)   | 317/5820 (5.45%)   | 0.9973910069 |
| Mth1p  | 19/545 (3.49%)   | 346/5820 (5.95%)   | 0.9975829184 |
| Hap2p  | 124/545 (22.75%) | 1614/5820 (27.73%) | 0.9976253497 |
| lsw1p  | 25/545 (4.59%)   | 428/5820 (7.35%)   | 0.9977341782 |
| Otu1p  | 17/545 (3.12%)   | 328/5820 (5.64%)   | 0.9985447022 |
| lsw2p  | 86/545 (15.78%)  | 1204/5820 (20.69%) | 0.9990607163 |
| Gts1p  | 29/545 (5.32%)   | 504/5820 (8.66%)   | 0.9992317119 |
| Nnf2p  | 14/545 (2.57%)   | 298/5820 (5.12%)   | 0.9993030886 |
| Gal11p | 55/545 (10.09%)  | 841/5820 (14.45%)  | 0.9993795395 |
| Cup9p  | 74/545 (13.58%)  | 1085/5820 (18.64%) | 0.9996042028 |
| Spt10p | 134/545 (24.59%) | 1793/5820 (30.81%) | 0.9996777665 |
| Tos4p  | 7/545 (1.28%)    | 202/5820 (3.47%)   | 0.9997077574 |
| Ndt80p | 31/545 (5.69%)   | 568/5820 (9.76%)   | 0.9998769301 |
| Gal4p  | 82/545 (15.05%)  | 1213/5820 (20.84%) | 0.999880559  |
| Snf2p  | 154/545 (28.26%) | 2081/5820 (35.76%) | 0.9999600565 |
| Sir2p  | 103/545 (18.9%)  | 1493/5820 (25.65%) | 0.9999615321 |
| Spt20p | 139/545 (25.5%)  | 1937/5820 (33.28%) | 0.9999851852 |
| Tup1p  | 203/545 (37.25%) | 2660/5820 (45.7%)  | 0.9999885745 |
| Met4p  | 100/545 (18.35%) | 1548/5820 (26.6%)  | 0.9999991633 |
| Snf6p  | 190/545 (34.86%) | 2640/5820 (45.36%) | 0.9999999298 |
| Sas3p  | 65/545 (11.93%)  | 1183/5820 (20.33%) | 0.9999999775 |
| Spt4p  | 83/545 (15.23%)  | 1428/5820 (24.54%) | 0.9999999898 |

$\alpha^{\text{BON}} = 1.69 \times 10^{-4}$

**(C) TF enrichment in down-regulated genes in  $\Delta ssb1\Delta ssb2$** 

| Transcription factor | Sample frequency | Background frequency | p-value      |
|----------------------|------------------|----------------------|--------------|
| lfn1p                | 57/288 (19.79%)  | 498/5820 (8.56%)     | 6.809441E-10 |
| Opi1p                | 44/288 (15.28%)  | 379/5820 (6.51%)     | 5.5098793E-8 |
| Met28p               | 32/288 (11.11%)  | 229/5820 (3.93%)     | 6.250287E-8  |
| Stb3p                | 11/288 (3.82%)   | 34/5820 (0.58%)      | 3.7175837E-7 |
| Gcn4p                | 189/288 (65.63%) | 2994/5820 (51.44%)   | 4.2996307E-7 |
| Taf14p               | 77/288 (26.74%)  | 909/5820 (15.62%)    | 4.7944715E-7 |
| Tda9p                | 29/288 (10.07%)  | 214/5820 (3.68%)     | 5.278337E-7  |
| Fkh1p                | 70/288 (24.31%)  | 807/5820 (13.87%)    | 7.8772119E-7 |
| Met32p               | 53/288 (18.4%)   | 549/5820 (9.43%)     | 9.800232E-7  |
| Cac2p                | 61/288 (21.18%)  | 672/5820 (11.55%)    | 1.0761637E-6 |
| Mig1p                | 46/288 (15.97%)  | 449/5820 (7.71%)     | 1.1103542E-6 |
| Yhp1p                | 98/288 (34.03%)  | 1287/5820 (22.11%)   | 1.294425E-6  |
| Cdc73p               | 68/288 (23.61%)  | 789/5820 (13.56%)    | 1.5172022E-6 |
| Srb5p                | 12/288 (4.17%)   | 49/5820 (0.84%)      | 3.0459197E-6 |
| Ric1p                | 58/288 (20.14%)  | 648/5820 (11.13%)    | 3.3520545E-6 |
| Snf5p                | 101/288 (35.07%) | 1373/5820 (23.59%)   | 4.2884996E-6 |
| Rap1p                | 185/288 (64.24%) | 2997/5820 (51.49%)   | 5.1986871E-6 |
| Hsf1p                | 119/288 (41.32%) | 1726/5820 (29.66%)   | 0.0000101499 |
| Put3p                | 57/288 (19.79%)  | 658/5820 (11.31%)    | 0.0000114971 |
| Gln3p                | 88/288 (30.56%)  | 1180/5820 (20.27%)   | 0.0000145732 |
| lsw2p                | 89/288 (30.9%)   | 1204/5820 (20.69%)   | 0.0000182539 |
| Stp1p                | 60/288 (20.83%)  | 717/5820 (12.32%)    | 0.0000190014 |
| Rim101p              | 63/288 (21.88%)  | 771/5820 (13.25%)    | 0.0000238622 |
| Hms1p                | 76/288 (26.39%)  | 993/5820 (17.06%)    | 0.0000291148 |
| Adr1p                | 66/288 (22.92%)  | 827/5820 (14.21%)    | 0.0000312421 |
| Leu3p                | 56/288 (19.44%)  | 665/5820 (11.43%)    | 0.000032168  |
| Mot3p                | 51/288 (17.71%)  | 586/5820 (10.07%)    | 0.0000322982 |
| Tbs1p                | 16/288 (5.56%)   | 102/5820 (1.75%)     | 0.0000339773 |
| Rtg3p                | 56/288 (19.44%)  | 671/5820 (11.53%)    | 0.0000416745 |

|        |                  |                    |              |
|--------|------------------|--------------------|--------------|
| Mga2p  | 82/288 (28.47%)  | 1107/5820 (19.02%) | 0.0000424788 |
| Rme1p  | 39/288 (13.54%)  | 416/5820 (7.15%)   | 0.0000632931 |
| Gzf3p  | 30/288 (10.42%)  | 288/5820 (4.95%)   | 0.0000721736 |
| Hfi1p  | 100/288 (34.72%) | 1444/5820 (24.81%) | 0.0000726653 |
| Cbf1p  | 104/288 (36.11%) | 1523/5820 (26.17%) | 0.0000865342 |
| Ixr1p  | 115/288 (39.93%) | 1732/5820 (29.76%) | 0.0001006137 |
| Stb6p  | 14/288 (4.86%)   | 89/5820 (1.53%)    | 0.0001022553 |
| Fhl1p  | 88/288 (30.56%)  | 1241/5820 (21.32%) | 0.0001056361 |
| Bas1p  | 167/288 (57.99%) | 2755/5820 (47.34%) | 0.0001301026 |
| Rox1p  | 68/288 (23.61%)  | 900/5820 (15.46%)  | 0.0001331996 |
| Pdr8p  | 11/288 (3.82%)   | 60/5820 (1.03%)    | 0.0001405121 |
| Hap5p  | 40/288 (13.89%)  | 447/5820 (7.68%)   | 0.0001422305 |
| Snf11p | 21/288 (7.29%)   | 177/5820 (3.04%)   | 0.0001521356 |
| Mac1p  | 41/288 (14.24%)  | 465/5820 (7.99%)   | 0.0001614089 |
| Srb2p  | 62/288 (21.53%)  | 808/5820 (13.88%)  | 0.0001852374 |
| Kar4p  | 65/288 (22.57%)  | 860/5820 (14.78%)  | 0.0001941061 |
| Tis11p | 31/288 (10.76%)  | 319/5820 (5.48%)   | 0.0001990831 |
| Gcr2p  | 90/288 (31.25%)  | 1308/5820 (22.47%) | 0.0002615125 |
| Esc2p  | 52/288 (18.06%)  | 652/5820 (11.2%)   | 0.0002668416 |
| Rfx1p  | 55/288 (19.1%)   | 703/5820 (12.08%)  | 0.0002833932 |
| Rpd3p  | 14/288 (4.86%)   | 98/5820 (1.68%)    | 0.0002923824 |
| Ask10p | 18/288 (6.25%)   | 148/5820 (2.54%)   | 0.0003317619 |
| Sua7p  | 4/288 (1.39%)    | 8/5820 (0.14%)     | 0.0003509792 |
| Phd1p  | 58/288 (20.14%)  | 763/5820 (13.11%)  | 0.0004030239 |
| Hac1p  | 44/288 (15.28%)  | 535/5820 (9.19%)   | 0.0004386746 |
| Rtg1p  | 27/288 (9.38%)   | 277/5820 (4.76%)   | 0.0004964597 |
| Rsc1p  | 53/288 (18.4%)   | 687/5820 (11.8%)   | 0.0005273265 |
| Pdr3p  | 81/288 (28.13%)  | 1177/5820 (20.22%) | 0.0006113552 |
| Gis1p  | 33/288 (11.46%)  | 371/5820 (6.37%)   | 0.0006326899 |
| Cin5p  | 134/288 (46.53%) | 2180/5820 (37.46%) | 0.000775184  |
| Stb1p  | 33/288 (11.46%)  | 376/5820 (6.46%)   | 0.0008008985 |



|        |                  |                    |              |
|--------|------------------|--------------------|--------------|
| Tho2p  | 11/288 (3.82%)   | 73/5820 (1.25%)    | 0.0008221773 |
| Yap7p  | 51/288 (17.71%)  | 667/5820 (11.46%)  | 0.0008412421 |
| Hel2p  | 21/288 (7.29%)   | 203/5820 (3.49%)   | 0.0009862846 |
| Zap1p  | 99/288 (34.38%)  | 1530/5820 (26.29%) | 0.0011227425 |
| Gal3p  | 12/288 (4.17%)   | 88/5820 (1.51%)    | 0.0011993351 |
| Zds1p  | 33/288 (11.46%)  | 388/5820 (6.67%)   | 0.0013742476 |
| Nnf2p  | 27/288 (9.38%)   | 298/5820 (5.12%)   | 0.0015193752 |
| Aft2p  | 39/288 (13.54%)  | 486/5820 (8.35%)   | 0.0015232665 |
| Flo8p  | 47/288 (16.32%)  | 618/5820 (10.62%)  | 0.0015474582 |
| Hda1p  | 34/288 (11.81%)  | 407/5820 (6.99%)   | 0.0015812506 |
| Met31p | 34/288 (11.81%)  | 407/5820 (6.99%)   | 0.0015812506 |
| Arg82p | 16/288 (5.56%)   | 142/5820 (2.44%)   | 0.0016182533 |
| Tye7p  | 82/288 (28.47%)  | 1237/5820 (21.25%) | 0.0018060588 |
| Yap3p  | 29/288 (10.07%)  | 333/5820 (5.72%)   | 0.0018846575 |
| Yox1p  | 92/288 (31.94%)  | 1428/5820 (24.54%) | 0.002140009  |
| Ino2p  | 35/288 (12.15%)  | 431/5820 (7.41%)   | 0.0021954231 |
| Ume6p  | 61/288 (21.18%)  | 872/5820 (14.98%)  | 0.0023735645 |
| Pho4p  | 90/288 (31.25%)  | 1406/5820 (24.16%) | 0.0029987773 |
| Srb8p  | 43/288 (14.93%)  | 572/5820 (9.83%)   | 0.0031103785 |
| Gal4p  | 79/288 (27.43%)  | 1213/5820 (20.84%) | 0.0037323133 |
| Hal9p  | 24/288 (8.33%)   | 272/5820 (4.67%)   | 0.0038948561 |
| Hms2p  | 13/288 (4.51%)   | 114/5820 (1.96%)   | 0.0039102944 |
| Pdr1p  | 91/288 (31.6%)   | 1438/5820 (24.71%) | 0.0040049543 |
| Hst1p  | 21/288 (7.29%)   | 228/5820 (3.92%)   | 0.0041385191 |
| Gat1p  | 20/288 (6.94%)   | 214/5820 (3.68%)   | 0.0043211049 |
| Mig3p  | 103/288 (35.76%) | 1669/5820 (28.68%) | 0.0044524183 |
| Pho2p  | 71/288 (24.65%)  | 1075/5820 (18.47%) | 0.0044538813 |
| Dal81p | 30/288 (10.42%)  | 369/5820 (6.34%)   | 0.0044646194 |
| Spt3p  | 79/288 (27.43%)  | 1230/5820 (21.13%) | 0.0054522426 |
| Skn7p  | 62/288 (21.53%)  | 922/5820 (15.84%)  | 0.0055116995 |
| Dot5p  | 12/288 (4.17%)   | 106/5820 (1.82%)   | 0.005814574  |

|         |                  |                    |              |
|---------|------------------|--------------------|--------------|
| Aft1p   | 87/288 (30.21%)  | 1385/5820 (23.8%)  | 0.0062811753 |
| Gcr1p   | 100/288 (34.72%) | 1630/5820 (28.01%) | 0.0063207371 |
| Cat8p   | 20/288 (6.94%)   | 223/5820 (3.83%)   | 0.0068304853 |
| Sum1p   | 44/288 (15.28%)  | 615/5820 (10.57%)  | 0.006940501  |
| Swi3p   | 109/288 (37.85%) | 1821/5820 (31.29%) | 0.008976028  |
| Sfl1p   | 14/288 (4.86%)   | 140/5820 (2.41%)   | 0.0090226318 |
| Stb5p   | 74/288 (25.69%)  | 1162/5820 (19.97%) | 0.0091087885 |
| Ssn2p   | 25/288 (8.68%)   | 309/5820 (5.31%)   | 0.0097519932 |
| Sok2p   | 131/288 (45.49%) | 2255/5820 (38.75%) | 0.0098877428 |
| Gat4p   | 19/288 (6.6%)    | 218/5820 (3.75%)   | 0.0111016309 |
| Rph1p   | 34/288 (11.81%)  | 463/5820 (7.96%)   | 0.011957558  |
| Nut1p   | 22/288 (7.64%)   | 269/5820 (4.62%)   | 0.0132810976 |
| Ppr1p   | 17/288 (5.9%)    | 192/5820 (3.3%)    | 0.0137398644 |
| Rtf1p   | 33/288 (11.46%)  | 453/5820 (7.78%)   | 0.0147648429 |
| Hat2p   | 35/288 (12.15%)  | 487/5820 (8.37%)   | 0.0147718437 |
| Uls1p   | 47/288 (16.32%)  | 700/5820 (12.03%)  | 0.0164283433 |
| Rtt107p | 36/288 (12.5%)   | 508/5820 (8.73%)   | 0.0165083898 |
| Mig2p   | 24/288 (8.33%)   | 307/5820 (5.27%)   | 0.0166057315 |
| Hst3p   | 14/288 (4.86%)   | 151/5820 (2.59%)   | 0.0168402537 |
| Rds2p   | 39/288 (13.54%)  | 561/5820 (9.64%)   | 0.0170430851 |
| Pip2p   | 80/288 (27.78%)  | 1306/5820 (22.44%) | 0.0171721582 |
| Rsc2p   | 49/288 (17.01%)  | 741/5820 (12.73%)  | 0.0186548208 |
| Swi5p   | 113/288 (39.24%) | 1944/5820 (33.4%)  | 0.0192214257 |
| Dal80p  | 17/288 (5.9%)    | 201/5820 (3.45%)   | 0.0207495134 |
| Sin3p   | 104/288 (36.11%) | 1782/5820 (30.62%) | 0.0234003001 |
| Hpa2p   | 7/288 (2.43%)    | 59/5820 (1.01%)    | 0.0253848452 |
| Cup9p   | 67/288 (23.26%)  | 1085/5820 (18.64%) | 0.0256081791 |
| Hir2p   | 23/288 (7.99%)   | 303/5820 (5.21%)   | 0.0256481281 |
| Sir1p   | 23/288 (7.99%)   | 307/5820 (5.27%)   | 0.0293152207 |
| Jhd1p   | 10/288 (3.47%)   | 105/5820 (1.8%)    | 0.034128091  |
| Eds1p   | 12/288 (4.17%)   | 136/5820 (2.34%)   | 0.036158165  |

|         |                  |                    |              |
|---------|------------------|--------------------|--------------|
| Upc2p   | 23/288 (7.99%)   | 314/5820 (5.4%)    | 0.0366777326 |
| Set2p   | 24/288 (8.33%)   | 331/5820 (5.69%)   | 0.0368323119 |
| Cad1p   | 50/288 (17.36%)  | 794/5820 (13.64%)  | 0.0391969973 |
| Cha4p   | 17/288 (5.9%)    | 217/5820 (3.73%)   | 0.0395727879 |
| Spt20p  | 110/288 (38.19%) | 1937/5820 (33.28%) | 0.0410481197 |
| Aro80p  | 29/288 (10.07%)  | 428/5820 (7.35%)   | 0.0496284546 |
| Mal13p  | 7/288 (2.43%)    | 69/5820 (1.19%)    | 0.0530764341 |
| Smk1p   | 10/288 (3.47%)   | 115/5820 (1.98%)   | 0.057543855  |
| Mcm1p   | 95/288 (32.99%)  | 1670/5820 (28.69%) | 0.0578501338 |
| YFL052W | 8/288 (2.78%)    | 85/5820 (1.46%)    | 0.0581230189 |
| Gal11p  | 51/288 (17.71%)  | 841/5820 (14.45%)  | 0.0661023501 |
| Ert1p   | 15/288 (5.21%)   | 199/5820 (3.42%)   | 0.067181336  |
| Smp1p   | 20/288 (6.94%)   | 284/5820 (4.88%)   | 0.0685096357 |
| Nsi1p   | 8/288 (2.78%)    | 88/5820 (1.51%)    | 0.068518279  |
| Pib2p   | 25/288 (8.68%)   | 371/5820 (6.37%)   | 0.0688770116 |
| Ndt80p  | 36/288 (12.5%)   | 568/5820 (9.76%)   | 0.0695936851 |
| Mss11p  | 38/288 (13.19%)  | 605/5820 (10.4%)   | 0.0704791873 |
| YKL222C | 6/288 (2.08%)    | 60/5820 (1.03%)    | 0.0746867728 |
| YPR022C | 10/288 (3.47%)   | 121/5820 (2.08%)   | 0.075711122  |
| YPR015C | 11/288 (3.82%)   | 138/5820 (2.37%)   | 0.0790563845 |
| Snf1p   | 19/288 (6.6%)    | 272/5820 (4.67%)   | 0.0793398839 |
| Bdf2p   | 26/288 (9.03%)   | 396/5820 (6.8%)    | 0.0821056235 |
| Rco1p   | 30/288 (10.42%)  | 469/5820 (8.06%)   | 0.0846187638 |
| Sut1p   | 27/288 (9.38%)   | 417/5820 (7.16%)   | 0.0881578469 |
| Rpn4p   | 99/288 (34.38%)  | 1783/5820 (30.64%) | 0.0900013609 |
| Ash1p   | 169/288 (58.68%) | 3188/5820 (54.78%) | 0.0957603017 |
| Sds3p   | 38/288 (13.19%)  | 625/5820 (10.74%)  | 0.1019844583 |
| Sko1p   | 54/288 (18.75%)  | 925/5820 (15.89%)  | 0.1024144536 |
| Uga3p   | 21/288 (7.29%)   | 317/5820 (5.45%)   | 0.1031459535 |
| lsw1p   | 27/288 (9.38%)   | 428/5820 (7.35%)   | 0.1113019714 |
| Aca1p   | 19/288 (6.6%)    | 285/5820 (4.9%)    | 0.1118941331 |

|         |                  |                    |              |
|---------|------------------|--------------------|--------------|
| Ngg1p   | 6/288 (2.08%)    | 69/5820 (1.19%)    | 0.1248670506 |
| Spt10p  | 98/288 (34.03%)  | 1793/5820 (30.81%) | 0.1258042621 |
| Gal80p  | 7/288 (2.43%)    | 85/5820 (1.46%)    | 0.1264182789 |
| Mal33p  | 38/288 (13.19%)  | 639/5820 (10.98%)  | 0.1289512984 |
| Mds3p   | 4/288 (1.39%)    | 40/5820 (0.69%)    | 0.133795709  |
| Yrr1p   | 42/288 (14.58%)  | 718/5820 (12.34%)  | 0.1369827316 |
| Ssn3p   | 7/288 (2.43%)    | 87/5820 (1.49%)    | 0.1380566662 |
| Wtm1p   | 13/288 (4.51%)   | 188/5820 (3.23%)   | 0.1382545203 |
| Nrg1p   | 42/288 (14.58%)  | 720/5820 (12.37%)  | 0.1411182543 |
| Yap5p   | 50/288 (17.36%)  | 874/5820 (15.02%)  | 0.145478641  |
| Ada2p   | 10/288 (3.47%)   | 139/5820 (2.39%)   | 0.1494852471 |
| Pgd1p   | 27/288 (9.38%)   | 444/5820 (7.63%)   | 0.1513361969 |
| Dot6p   | 11/288 (3.82%)   | 159/5820 (2.73%)   | 0.1630648968 |
| Hap3p   | 19/288 (6.6%)    | 303/5820 (5.21%)   | 0.1688279054 |
| Pho23p  | 9/288 (3.13%)    | 126/5820 (2.16%)   | 0.170692308  |
| Snf2p   | 111/288 (38.54%) | 2081/5820 (35.76%) | 0.1712586282 |
| Spt23p  | 98/288 (34.03%)  | 1827/5820 (31.39%) | 0.1775633566 |
| Azf1p   | 13/288 (4.51%)   | 198/5820 (3.4%)    | 0.1809673514 |
| Thi2p   | 45/288 (15.63%)  | 798/5820 (13.71%)  | 0.1880417298 |
| Rgt1p   | 29/288 (10.07%)  | 496/5820 (8.52%)   | 0.1938068992 |
| Hir3p   | 24/288 (8.33%)   | 405/5820 (6.96%)   | 0.2026863111 |
| Vms1p   | 12/288 (4.17%)   | 185/5820 (3.18%)   | 0.2043599963 |
| Bye1p   | 10/288 (3.47%)   | 150/5820 (2.58%)   | 0.2077975031 |
| Rlm1p   | 40/288 (13.89%)  | 711/5820 (12.22%)  | 0.2105612447 |
| Snt2p   | 9/288 (3.13%)    | 135/5820 (2.32%)   | 0.2240577866 |
| Xbp1p   | 40/288 (13.89%)  | 716/5820 (12.3%)   | 0.2242338103 |
| Ecm22p  | 30/288 (10.42%)  | 526/5820 (9.04%)   | 0.2284733537 |
| Swi4p   | 58/288 (20.14%)  | 1067/5820 (18.33%) | 0.2293537015 |
| YJL206C | 11/288 (3.82%)   | 172/5820 (2.96%)   | 0.2310312075 |
| Tod6p   | 6/288 (2.08%)    | 84/5820 (1.44%)    | 0.2351949343 |
| Sut2p   | 11/288 (3.82%)   | 174/5820 (2.99%)   | 0.242376522  |

|         |                  |                    |              |
|---------|------------------|--------------------|--------------|
| Yap6p   | 53/288 (18.4%)   | 975/5820 (16.75%)  | 0.242987526  |
| Hat1p   | 4/288 (1.39%)    | 51/5820 (0.88%)    | 0.2443130955 |
| Hog1p   | 13/288 (4.51%)   | 211/5820 (3.63%)   | 0.2447582679 |
| Msn4p   | 133/288 (46.18%) | 2565/5820 (44.07%) | 0.2484345499 |
| Msn1p   | 17/288 (5.9%)    | 286/5820 (4.91%)   | 0.248871296  |
| Mbp1p   | 38/288 (13.19%)  | 691/5820 (11.87%)  | 0.264045632  |
| Nrg2p   | 20/288 (6.94%)   | 346/5820 (5.95%)   | 0.2646069947 |
| Dat1p   | 14/288 (4.86%)   | 235/5820 (4.04%)   | 0.2732877799 |
| YNR063W | 4/288 (1.39%)    | 54/5820 (0.93%)    | 0.2774791029 |
| Msi1p   | 14/288 (4.86%)   | 236/5820 (4.06%)   | 0.2785188561 |
| Rlf2p   | 45/288 (15.63%)  | 840/5820 (14.43%)  | 0.3022266169 |
| Hmo1p   | 53/288 (18.4%)   | 1010/5820 (17.35%) | 0.3389712394 |
| Spt4p   | 74/288 (25.69%)  | 1428/5820 (24.54%) | 0.341895816  |
| Hst4p   | 8/288 (2.78%)    | 134/5820 (2.3%)    | 0.3442967104 |
| Tup1p   | 135/288 (46.88%) | 2660/5820 (45.7%)  | 0.3633017615 |
| Rdr1p   | 13/288 (4.51%)   | 234/5820 (4.02%)   | 0.3736491667 |
| Rsc30p  | 6/288 (2.08%)    | 102/5820 (1.75%)   | 0.3925288822 |
| Oaf1p   | 46/288 (15.97%)  | 891/5820 (15.31%)  | 0.4001402117 |
| Not3p   | 13/288 (4.51%)   | 239/5820 (4.11%)   | 0.4031335167 |
| Cse2p   | 40/288 (13.89%)  | 776/5820 (13.33%)  | 0.4151372528 |
| Mot2p   | 7/288 (2.43%)    | 124/5820 (2.13%)   | 0.4162199602 |
| YGR067C | 10/288 (3.47%)   | 183/5820 (3.14%)   | 0.4200897232 |
| Met18p  | 13/288 (4.51%)   | 242/5820 (4.16%)   | 0.4209049624 |
| Sas5p   | 17/288 (5.9%)    | 321/5820 (5.52%)   | 0.4217599523 |
| Crz1p   | 26/288 (9.03%)   | 500/5820 (8.59%)   | 0.4248498532 |
| Urc2p   | 16/288 (5.56%)   | 302/5820 (5.19%)   | 0.4257186792 |
| Stb2p   | 12/288 (4.17%)   | 224/5820 (3.85%)   | 0.4311287378 |
| Stp2p   | 33/288 (11.46%)  | 643/5820 (11.05%)  | 0.4389895102 |
| Mga1p   | 36/288 (12.5%)   | 703/5820 (12.08%)  | 0.4392562124 |
| YPR196W | 9/288 (3.13%)    | 167/5820 (2.87%)   | 0.4455928006 |
| Yap1p   | 148/288 (51.39%) | 2959/5820 (50.84%) | 0.4484173778 |

|         |                  |                    |              |
|---------|------------------|--------------------|--------------|
| Arg81p  | 18/288 (6.25%)   | 349/5820 (6%)      | 0.463266976  |
| Sif2p   | 22/288 (7.64%)   | 432/5820 (7.42%)   | 0.4769187806 |
| Sef1p   | 13/288 (4.51%)   | 252/5820 (4.33%)   | 0.4800615761 |
| Mbf1p   | 10/288 (3.47%)   | 198/5820 (3.4%)    | 0.5208302759 |
| Hot1p   | 4/288 (1.39%)    | 77/5820 (1.32%)    | 0.5338881486 |
| Dal82p  | 40/288 (13.89%)  | 812/5820 (13.95%)  | 0.5398687887 |
| Gat3p   | 22/288 (7.64%)   | 446/5820 (7.66%)   | 0.5401428425 |
| Sip4p   | 12/288 (4.17%)   | 242/5820 (4.16%)   | 0.5407343136 |
| Spt2p   | 19/288 (6.6%)    | 386/5820 (6.63%)   | 0.5456153213 |
| Tos4p   | 10/288 (3.47%)   | 202/5820 (3.47%)   | 0.5468796684 |
| Fzf1p   | 10/288 (3.47%)   | 203/5820 (3.49%)   | 0.5533121543 |
| Kss1p   | 9/288 (3.13%)    | 186/5820 (3.2%)    | 0.5773424201 |
| Oaf3p   | 20/288 (6.94%)   | 416/5820 (7.15%)   | 0.5893761704 |
| Gts1p   | 24/288 (8.33%)   | 504/5820 (8.66%)   | 0.6121553884 |
| Stb4p   | 4/288 (1.39%)    | 85/5820 (1.46%)    | 0.6130220621 |
| Asg1p   | 12/288 (4.17%)   | 256/5820 (4.4%)    | 0.6208234517 |
| Sip3p   | 3/288 (1.04%)    | 65/5820 (1.12%)    | 0.6313280874 |
| Sas4p   | 6/288 (2.08%)    | 131/5820 (2.25%)   | 0.6363522052 |
| YER130C | 8/288 (2.78%)    | 174/5820 (2.99%)   | 0.6368217968 |
| Arr1p   | 77/288 (26.74%)  | 1601/5820 (27.51%) | 0.6408588227 |
| Mth1p   | 16/288 (5.56%)   | 346/5820 (5.95%)   | 0.6501583107 |
| Usv1p   | 6/288 (2.08%)    | 133/5820 (2.29%)   | 0.6510094939 |
| Cup2p   | 27/288 (9.38%)   | 578/5820 (9.93%)   | 0.6570653687 |
| Reb1p   | 48/288 (16.67%)  | 1013/5820 (17.41%) | 0.6575599506 |
| Msn2p   | 166/288 (57.64%) | 3411/5820 (58.61%) | 0.6578149185 |
| Cst6p   | 130/288 (45.14%) | 2695/5820 (46.31%) | 0.679687735  |
| Swi6p   | 35/288 (12.15%)  | 754/5820 (12.96%)  | 0.6882188622 |
| Dig1p   | 17/288 (5.9%)    | 376/5820 (6.46%)   | 0.68923716   |
| Rif2p   | 3/288 (1.04%)    | 73/5820 (1.25%)    | 0.7084009237 |
| Hir1p   | 14/288 (4.86%)   | 320/5820 (5.5%)    | 0.7246528466 |
| Pdc2p   | 1/288 (0.35%)    | 26/5820 (0.45%)    | 0.7335151701 |

|         |                  |                    |              |
|---------|------------------|--------------------|--------------|
| Wtm2p   | 7/288 (2.43%)    | 168/5820 (2.89%)   | 0.7337817227 |
| Hap1p   | 14/288 (4.86%)   | 328/5820 (5.64%)   | 0.7575606127 |
| Otu1p   | 14/288 (4.86%)   | 328/5820 (5.64%)   | 0.7575606127 |
| Stp4p   | 7/288 (2.43%)    | 176/5820 (3.02%)   | 0.7764374708 |
| Srd1p   | 2/288 (0.69%)    | 57/5820 (0.98%)    | 0.7815993222 |
| Hap4p   | 39/288 (13.54%)  | 881/5820 (15.14%)  | 0.8036740539 |
| Tos8p   | 17/288 (5.9%)    | 407/5820 (6.99%)   | 0.8038109986 |
| War1p   | 3/288 (1.04%)    | 87/5820 (1.49%)    | 0.8126926908 |
| Plm2p   | 7/288 (2.43%)    | 185/5820 (3.18%)   | 0.8181820402 |
| Fkh2p   | 30/288 (10.42%)  | 698/5820 (11.99%)  | 0.8252408657 |
| Tbf1p   | 21/288 (7.29%)   | 505/5820 (8.68%)   | 0.8322053805 |
| Sin4p   | 103/288 (35.76%) | 2232/5820 (38.35%) | 0.838433414  |
| Sir3p   | 37/288 (12.85%)  | 863/5820 (14.83%)  | 0.8549747118 |
| Ime1p   | 4/288 (1.39%)    | 122/5820 (2.1%)    | 0.8615143679 |
| Snf6p   | 122/288 (42.36%) | 2640/5820 (45.36%) | 0.8664987471 |
| Pop2p   | 6/288 (2.08%)    | 179/5820 (3.08%)   | 0.8854370508 |
| Hap2p   | 71/288 (24.65%)  | 1614/5820 (27.73%) | 0.8980854186 |
| Abf1p   | 129/288 (44.79%) | 2811/5820 (48.3%)  | 0.9002205336 |
| Ste12p  | 181/288 (62.85%) | 3852/5820 (66.19%) | 0.9012010546 |
| YLR278C | 16/288 (5.56%)   | 425/5820 (7.3%)    | 0.9046736222 |
| Rds1p   | 9/288 (3.13%)    | 260/5820 (4.47%)   | 0.9049808818 |
| Rpi1p   | 5/288 (1.74%)    | 173/5820 (2.97%)   | 0.9359491914 |
| Ino4p   | 33/288 (11.46%)  | 832/5820 (14.3%)   | 0.9361915514 |
| Sas3p   | 49/288 (17.01%)  | 1183/5820 (20.33%) | 0.9366156317 |
| Sps18p  | 10/288 (3.47%)   | 303/5820 (5.21%)   | 0.9397021327 |
| Pog1p   | 2/288 (0.69%)    | 94/5820 (1.62%)    | 0.9513026518 |
| YER184C | 6/288 (2.08%)    | 210/5820 (3.61%)   | 0.9533732269 |
| Arg80p  | 13/288 (4.51%)   | 395/5820 (6.79%)   | 0.9612843186 |
| Gsm1p   | 4/288 (1.39%)    | 169/5820 (2.9%)    | 0.9715609708 |
| Rsf2p   | 14/288 (4.86%)   | 433/5820 (7.44%)   | 0.9720110506 |
| Ndd1p   | 2/288 (0.69%)    | 107/5820 (1.84%)   | 0.9721993596 |

|       |                  |                    |              |
|-------|------------------|--------------------|--------------|
| Ace2p | 224/288 (77.78%) | 4775/5820 (82.04%) | 0.9757469762 |
| Sfp1p | 199/288 (69.1%)  | 4335/5820 (74.48%) | 0.9855503883 |
| Sir2p | 58/288 (20.14%)  | 1493/5820 (25.65%) | 0.9896929453 |
| Rgm1p | 11/288 (3.82%)   | 395/5820 (6.79%)   | 0.989990022  |
| Yrm1p | 110/288 (38.19%) | 2605/5820 (44.76%) | 0.991123093  |
| Haa1p | 21/288 (7.29%)   | 667/5820 (11.46%)  | 0.9937655194 |
| Hcm1p | 11/288 (3.82%)   | 424/5820 (7.29%)   | 0.9957870231 |
| Met4p | 58/288 (20.14%)  | 1548/5820 (26.6%)  | 0.9963003618 |
| Tec1p | 166/288 (57.64%) | 3818/5820 (65.6%)  | 0.9983697437 |
| Rif1p | 7/288 (2.43%)    | 358/5820 (6.15%)   | 0.9992128097 |
| Caf4p | 2/288 (0.69%)    | 189/5820 (3.25%)   | 0.9993508267 |

$\alpha^{\text{BON}} = 1.74 \times 10^{-4}$

#### (D) TF enrichment in down-regulated genes in $\Delta reg1$

| Transcription factor | Sample frequency | Background frequency | p-value      |
|----------------------|------------------|----------------------|--------------|
| Cdc73p               | 118/449 (26.28%) | 789/5820 (13.56%)    | 4.948807E-14 |
| Nnf2p                | 55/449 (12.25%)  | 298/5820 (5.12%)     | 4.164611E-10 |
| Gal4p                | 138/449 (30.74%) | 1213/5820 (20.84%)   | 1.7667297E-7 |
| Cup9p                | 126/449 (28.06%) | 1085/5820 (18.64%)   | 2.4440019E-7 |
| Rsc1p                | 87/449 (19.38%)  | 687/5820 (11.8%)     | 8.8200149E-7 |
| Rox1p                | 107/449 (23.83%) | 900/5820 (15.46%)    | 8.8971268E-7 |
| Esc2p                | 81/449 (18.04%)  | 652/5820 (11.2%)     | 4.9705856E-6 |
| Spt3p                | 133/449 (29.62%) | 1230/5820 (21.13%)   | 6.3172877E-6 |
| Srb2p                | 95/449 (21.16%)  | 808/5820 (13.88%)    | 7.2458284E-6 |
| Pdr8p                | 16/449 (3.56%)   | 60/5820 (1.03%)      | 7.5273363E-6 |
| Snf5p                | 145/449 (32.29%) | 1373/5820 (23.59%)   | 7.5573495E-6 |
| Isw2p                | 130/449 (28.95%) | 1204/5820 (20.69%)   | 9.1888108E-6 |
| Hst3p                | 28/449 (6.24%)   | 151/5820 (2.59%)     | 9.2763395E-6 |
| Uls1p                | 84/449 (18.71%)  | 700/5820 (12.03%)    | 0.0000128155 |
| Mot3p                | 72/449 (16.04%)  | 586/5820 (10.07%)    | 0.0000271201 |



|         |                  |                    |              |
|---------|------------------|--------------------|--------------|
| Mcm1p   | 167/449 (37.19%) | 1670/5820 (28.69%) | 0.0000311829 |
| Kar4p   | 97/449 (21.6%)   | 860/5820 (14.78%)  | 0.000033424  |
| Put3p   | 78/449 (17.37%)  | 658/5820 (11.31%)  | 0.0000433199 |
| Mga2p   | 118/449 (26.28%) | 1107/5820 (19.02%) | 0.0000527081 |
| Rgt1p   | 62/449 (13.81%)  | 496/5820 (8.52%)   | 0.0000636141 |
| Spt20p  | 187/449 (41.65%) | 1937/5820 (33.28%) | 0.0000704048 |
| Tda9p   | 33/449 (7.35%)   | 214/5820 (3.68%)   | 0.0000803977 |
| Gal11p  | 93/449 (20.71%)  | 841/5820 (14.45%)  | 0.0001094391 |
| Gcr2p   | 133/449 (29.62%) | 1308/5820 (22.47%) | 0.0001488524 |
| Cac2p   | 77/449 (17.15%)  | 672/5820 (11.55%)  | 0.0001552062 |
| Pip2p   | 132/449 (29.4%)  | 1306/5820 (22.44%) | 0.0002118652 |
| lsw1p   | 53/449 (11.8%)   | 428/5820 (7.35%)   | 0.0002885872 |
| Rsc2p   | 82/449 (18.26%)  | 741/5820 (12.73%)  | 0.0002992396 |
| Rtt107p | 60/449 (13.36%)  | 508/5820 (8.73%)   | 0.0004111957 |
| Rpd3p   | 18/449 (4.01%)   | 98/5820 (1.68%)    | 0.0004181812 |
| Taf14p  | 96/449 (21.38%)  | 909/5820 (15.62%)  | 0.0004622952 |
| Zds1p   | 48/449 (10.69%)  | 388/5820 (6.67%)   | 0.0005784962 |
| Yap7p   | 73/449 (16.26%)  | 667/5820 (11.46%)  | 0.0009339336 |
| Aro80p  | 51/449 (11.36%)  | 428/5820 (7.35%)   | 0.0009364706 |
| Xbp1p   | 77/449 (17.15%)  | 716/5820 (12.3%)   | 0.0011181424 |
| Thi2p   | 84/449 (18.71%)  | 798/5820 (13.71%)  | 0.0012536033 |
| Stb5p   | 115/449 (25.61%) | 1162/5820 (19.97%) | 0.0014486984 |
| Rds2p   | 62/449 (13.81%)  | 561/5820 (9.64%)   | 0.0018514216 |
| Phd1p   | 80/449 (17.82%)  | 763/5820 (13.11%)  | 0.0018699503 |
| Aca1p   | 36/449 (8.02%)   | 285/5820 (4.9%)    | 0.0019693118 |
| Sif2p   | 50/449 (11.14%)  | 432/5820 (7.42%)   | 0.0019924787 |
| Gzf3p   | 36/449 (8.02%)   | 288/5820 (4.95%)   | 0.0023639969 |
| Yhp1p   | 124/449 (27.62%) | 1287/5820 (22.11%) | 0.0025046585 |
| Upc2p   | 38/449 (8.46%)   | 314/5820 (5.4%)    | 0.0032104136 |
| Ume6p   | 88/449 (19.6%)   | 872/5820 (14.98%)  | 0.0034256058 |
| Hms1p   | 98/449 (21.83%)  | 993/5820 (17.06%)  | 0.003912918  |

|         |                  |                    |              |
|---------|------------------|--------------------|--------------|
| Srb8p   | 61/449 (13.59%)  | 572/5820 (9.83%)   | 0.0046452775 |
| Yap3p   | 39/449 (8.69%)   | 333/5820 (5.72%)   | 0.0050435917 |
| Dig1p   | 43/449 (9.58%)   | 376/5820 (6.46%)   | 0.0050946955 |
| Pho2p   | 104/449 (23.16%) | 1075/5820 (18.47%) | 0.005452085  |
| Hat2p   | 53/449 (11.8%)   | 487/5820 (8.37%)   | 0.0054995027 |
| Tye7p   | 117/449 (26.06%) | 1237/5820 (21.25%) | 0.0065171469 |
| Sir1p   | 36/449 (8.02%)   | 307/5820 (5.27%)   | 0.0068115892 |
| Ino2p   | 47/449 (10.47%)  | 431/5820 (7.41%)   | 0.0084881519 |
| Sds3p   | 64/449 (14.25%)  | 625/5820 (10.74%)  | 0.0093744706 |
| Rme1p   | 45/449 (10.02%)  | 416/5820 (7.15%)   | 0.0114159099 |
| Rim101p | 76/449 (16.93%)  | 771/5820 (13.25%)  | 0.0118130952 |
| Swi5p   | 172/449 (38.31%) | 1944/5820 (33.4%)  | 0.0130629255 |
| Dat1p   | 28/449 (6.24%)   | 235/5820 (4.04%)   | 0.0131384272 |
| Opi1p   | 41/449 (9.13%)   | 379/5820 (6.51%)   | 0.0154219018 |
| Spt10p  | 159/449 (35.41%) | 1793/5820 (30.81%) | 0.016680142  |
| Cst6p   | 230/449 (51.22%) | 2695/5820 (46.31%) | 0.0168211619 |
| Cse2p   | 75/449 (16.7%)   | 776/5820 (13.33%)  | 0.0192928482 |
| Yox1p   | 129/449 (28.73%) | 1428/5820 (24.54%) | 0.0193316423 |
| Ric1p   | 64/449 (14.25%)  | 648/5820 (11.13%)  | 0.0198122301 |
| Tis11p  | 35/449 (7.8%)    | 319/5820 (5.48%)   | 0.01999027   |
| Bye1p   | 19/449 (4.23%)   | 150/5820 (2.58%)   | 0.0211054843 |
| Snf2p   | 180/449 (40.09%) | 2081/5820 (35.76%) | 0.0266425468 |
| Hst1p   | 26/449 (5.79%)   | 228/5820 (3.92%)   | 0.0273022097 |
| Rap1p   | 251/449 (55.9%)  | 2997/5820 (51.49%) | 0.0288609032 |
| Hda1p   | 42/449 (9.35%)   | 407/5820 (6.99%)   | 0.0293935982 |
| Ndt80p  | 56/449 (12.47%)  | 568/5820 (9.76%)   | 0.0294952392 |
| Bdf2p   | 41/449 (9.13%)   | 396/5820 (6.8%)    | 0.0297418287 |
| Smk1p   | 15/449 (3.34%)   | 115/5820 (1.98%)   | 0.0300840505 |
| Azf1p   | 23/449 (5.12%)   | 198/5820 (3.4%)    | 0.0303026732 |
| Mac1p   | 47/449 (10.47%)  | 465/5820 (7.99%)   | 0.0304024242 |
| Snf11p  | 21/449 (4.68%)   | 177/5820 (3.04%)   | 0.0305728259 |

|         |                  |                    |              |
|---------|------------------|--------------------|--------------|
| Ada2p   | 17/449 (3.79%)   | 139/5820 (2.39%)   | 0.0378910932 |
| YKL222C | 9/449 (2%)       | 60/5820 (1.03%)    | 0.0389284362 |
| Nrg1p   | 68/449 (15.14%)  | 720/5820 (12.37%)  | 0.0398341197 |
| Mss11p  | 58/449 (12.92%)  | 605/5820 (10.4%)   | 0.0436289669 |
| Hfi1p   | 127/449 (28.29%) | 1444/5820 (24.81%) | 0.0443034902 |
| Hap4p   | 81/449 (18.04%)  | 881/5820 (15.14%)  | 0.0451335894 |
| Pdc2p   | 5/449 (1.11%)    | 26/5820 (0.45%)    | 0.0455418816 |
| Tbs1p   | 13/449 (2.9%)    | 102/5820 (1.75%)   | 0.0488139255 |
| Ssn2p   | 32/449 (7.13%)   | 309/5820 (5.31%)   | 0.050915788  |
| YNR063W | 8/449 (1.78%)    | 54/5820 (0.93%)    | 0.0532218531 |
| Hms2p   | 14/449 (3.12%)   | 114/5820 (1.96%)   | 0.0545443367 |
| Sum1p   | 58/449 (12.92%)  | 615/5820 (10.57%)  | 0.0568637094 |
| Mal33p  | 60/449 (13.36%)  | 639/5820 (10.98%)  | 0.0571722069 |
| Ino4p   | 76/449 (16.93%)  | 832/5820 (14.3%)   | 0.0584043238 |
| Dal80p  | 22/449 (4.9%)    | 201/5820 (3.45%)   | 0.0586423233 |
| YFL052W | 11/449 (2.45%)   | 85/5820 (1.46%)    | 0.060815551  |
| Met31p  | 40/449 (8.91%)   | 407/5820 (6.99%)   | 0.0628361512 |
| Mga1p   | 65/449 (14.48%)  | 703/5820 (12.08%)  | 0.0633489932 |
| Tup1p   | 221/449 (49.22%) | 2660/5820 (45.7%)  | 0.065990668  |
| Swi3p   | 155/449 (34.52%) | 1821/5820 (31.29%) | 0.0696320678 |
| Stb1p   | 37/449 (8.24%)   | 376/5820 (6.46%)   | 0.0706386223 |
| Mig2p   | 31/449 (6.9%)    | 307/5820 (5.27%)   | 0.0709595201 |
| Rds3p   | 1/449 (0.22%)    | 1/5820 (0.02%)     | 0.0771477663 |
| Swi4p   | 94/449 (20.94%)  | 1067/5820 (18.33%) | 0.079375816  |
| Gln3p   | 103/449 (22.94%) | 1180/5820 (20.27%) | 0.0819754503 |
| Rtg1p   | 28/449 (6.24%)   | 277/5820 (4.76%)   | 0.0822914081 |
| Zap1p   | 131/449 (29.18%) | 1530/5820 (26.29%) | 0.0831049213 |
| Gis1p   | 36/449 (8.02%)   | 371/5820 (6.37%)   | 0.0863143936 |
| Cin5p   | 182/449 (40.53%) | 2180/5820 (37.46%) | 0.0886689778 |
| Hir2p   | 30/449 (6.68%)   | 303/5820 (5.21%)   | 0.0909761306 |
| Rtg3p   | 61/449 (13.59%)  | 671/5820 (11.53%)  | 0.0915169826 |

|         |                  |                    |              |
|---------|------------------|--------------------|--------------|
| Uga3p   | 31/449 (6.9%)    | 317/5820 (5.45%)   | 0.0981409342 |
| Gcr1p   | 138/449 (30.74%) | 1630/5820 (28.01%) | 0.1000448737 |
| Sok2p   | 187/449 (41.65%) | 2255/5820 (38.75%) | 0.1034840281 |
| Set2p   | 32/449 (7.13%)   | 331/5820 (5.69%)   | 0.1053127699 |
| Tho2p   | 9/449 (2%)       | 73/5820 (1.25%)    | 0.1071652877 |
| Rfx1p   | 63/449 (14.03%)  | 703/5820 (12.08%)  | 0.1078447193 |
| Jhd1p   | 12/449 (2.67%)   | 105/5820 (1.8%)    | 0.1085434058 |
| Swi6p   | 67/449 (14.92%)  | 754/5820 (12.96%)  | 0.112730974  |
| Dal81p  | 35/449 (7.8%)    | 369/5820 (6.34%)   | 0.1138530576 |
| Stb3p   | 5/449 (1.11%)    | 34/5820 (0.58%)    | 0.1171503197 |
| Ecm22p  | 48/449 (10.69%)  | 526/5820 (9.04%)   | 0.1192213666 |
| Snf6p   | 216/449 (48.11%) | 2640/5820 (45.36%) | 0.1216156981 |
| Nut1p   | 26/449 (5.79%)   | 269/5820 (4.62%)   | 0.1344077773 |
| Hog1p   | 21/449 (4.68%)   | 211/5820 (3.63%)   | 0.1347398468 |
| Hap1p   | 31/449 (6.9%)    | 328/5820 (5.64%)   | 0.1351426346 |
| Gal3p   | 10/449 (2.23%)   | 88/5820 (1.51%)    | 0.1385461719 |
| Stp1p   | 63/449 (14.03%)  | 717/5820 (12.32%)  | 0.141844531  |
| Ihf1p   | 45/449 (10.02%)  | 498/5820 (8.56%)   | 0.1432501159 |
| Usv1p   | 14/449 (3.12%)   | 133/5820 (2.29%)   | 0.1439719164 |
| Stb6p   | 10/449 (2.23%)   | 89/5820 (1.53%)    | 0.1460468364 |
| Rtf1p   | 41/449 (9.13%)   | 453/5820 (7.78%)   | 0.1543301952 |
| Sut1p   | 38/449 (8.46%)   | 417/5820 (7.16%)   | 0.1549858659 |
| Rsc30p  | 11/449 (2.45%)   | 102/5820 (1.75%)   | 0.1610933344 |
| Eds1p   | 14/449 (3.12%)   | 136/5820 (2.34%)   | 0.162914704  |
| Hpa2p   | 7/449 (1.56%)    | 59/5820 (1.01%)    | 0.1668450905 |
| Yap6p   | 83/449 (18.49%)  | 975/5820 (16.75%)  | 0.1687817094 |
| Gat4p   | 21/449 (4.68%)   | 218/5820 (3.75%)   | 0.1692750851 |
| YJL206C | 17/449 (3.79%)   | 172/5820 (2.96%)   | 0.1727255446 |
| Srb5p   | 6/449 (1.34%)    | 49/5820 (0.84%)    | 0.1733252419 |
| Hap5p   | 40/449 (8.91%)   | 447/5820 (7.68%)   | 0.1764787268 |
| YER184C | 20/449 (4.45%)   | 210/5820 (3.61%)   | 0.1898792275 |

|         |                  |                    |              |
|---------|------------------|--------------------|--------------|
| Dot5p   | 11/449 (2.45%)   | 106/5820 (1.82%)   | 0.1925508252 |
| Mig3p   | 137/449 (30.51%) | 1669/5820 (28.68%) | 0.1996974081 |
| Spt4p   | 118/449 (26.28%) | 1428/5820 (24.54%) | 0.200555436  |
| Hal9p   | 25/449 (5.57%)   | 272/5820 (4.67%)   | 0.2036697579 |
| Msn1p   | 26/449 (5.79%)   | 286/5820 (4.91%)   | 0.2140586098 |
| Rco1p   | 41/449 (9.13%)   | 469/5820 (8.06%)   | 0.2154105027 |
| Bas1p   | 221/449 (49.22%) | 2755/5820 (47.34%) | 0.2167464162 |
| Rlm1p   | 60/449 (13.36%)  | 711/5820 (12.22%)  | 0.2402640309 |
| Asg1p   | 23/449 (5.12%)   | 256/5820 (4.4%)    | 0.2494189019 |
| Sin4p   | 179/449 (39.87%) | 2232/5820 (38.35%) | 0.2613977203 |
| Pdr1p   | 117/449 (26.06%) | 1438/5820 (24.71%) | 0.2616541062 |
| Pho23p  | 12/449 (2.67%)   | 126/5820 (2.16%)   | 0.2644179543 |
| Flo8p   | 52/449 (11.58%)  | 618/5820 (10.62%)  | 0.2674215401 |
| Sir2p   | 121/449 (26.95%) | 1493/5820 (25.65%) | 0.2732021817 |
| Mal13p  | 7/449 (1.56%)    | 69/5820 (1.19%)    | 0.2813550885 |
| Met32p  | 46/449 (10.25%)  | 549/5820 (9.43%)   | 0.2937419253 |
| Crz1p   | 42/449 (9.35%)   | 500/5820 (8.59%)   | 0.298774543  |
| Urc2p   | 26/449 (5.79%)   | 302/5820 (5.19%)   | 0.3054672685 |
| Sas4p   | 12/449 (2.67%)   | 131/5820 (2.25%)   | 0.309790867  |
| Cha4p   | 19/449 (4.23%)   | 217/5820 (3.73%)   | 0.3146614597 |
| Hsf1p   | 138/449 (30.74%) | 1726/5820 (29.66%) | 0.3185075017 |
| YPR022C | 11/449 (2.45%)   | 121/5820 (2.08%)   | 0.3299818289 |
| YGR067C | 16/449 (3.56%)   | 183/5820 (3.14%)   | 0.3371059009 |
| Rdr1p   | 20/449 (4.45%)   | 234/5820 (4.02%)   | 0.3482858198 |
| Smp1p   | 24/449 (5.35%)   | 284/5820 (4.88%)   | 0.3491614129 |
| Hat1p   | 5/449 (1.11%)    | 51/5820 (0.88%)    | 0.3576167059 |
| Mbf1p   | 17/449 (3.79%)   | 198/5820 (3.4%)    | 0.3581562074 |
| Kss1p   | 16/449 (3.56%)   | 186/5820 (3.2%)    | 0.3615913073 |
| Mbp1p   | 56/449 (12.47%)  | 691/5820 (11.87%)  | 0.3642355829 |
| YPR015C | 12/449 (2.67%)   | 138/5820 (2.37%)   | 0.3761701134 |
| Sko1p   | 74/449 (16.48%)  | 925/5820 (15.89%)  | 0.3824315919 |

|        |                  |                    |              |
|--------|------------------|--------------------|--------------|
| Hot1p  | 7/449 (1.56%)    | 77/5820 (1.32%)    | 0.3834874007 |
| Sfl1p  | 12/449 (2.67%)   | 140/5820 (2.41%)   | 0.395491148  |
| Fkh2p  | 56/449 (12.47%)  | 698/5820 (11.99%)  | 0.3956001991 |
| Pho4p  | 111/449 (24.72%) | 1406/5820 (24.16%) | 0.4048262301 |
| Rpn4p  | 140/449 (31.18%) | 1783/5820 (30.64%) | 0.415715218  |
| Pib2p  | 30/449 (6.68%)   | 371/5820 (6.37%)   | 0.4205428816 |
| Skn7p  | 73/449 (16.26%)  | 922/5820 (15.84%)  | 0.422005027  |
| Rtg2p  | 1/449 (0.22%)    | 7/5820 (0.12%)     | 0.4301060163 |
| Stp2p  | 51/449 (11.36%)  | 643/5820 (11.05%)  | 0.4376469075 |
| Cbf1p  | 119/449 (26.5%)  | 1523/5820 (26.17%) | 0.4523983257 |
| Hap2p  | 126/449 (28.06%) | 1614/5820 (27.73%) | 0.4543337044 |
| Msi1p  | 19/449 (4.23%)   | 236/5820 (4.06%)   | 0.4581050186 |
| Ert1p  | 16/449 (3.56%)   | 199/5820 (3.42%)   | 0.4698831409 |
| Sua7p  | 1/449 (0.22%)    | 8/5820 (0.14%)     | 0.474125008  |
| Hac1p  | 42/449 (9.35%)   | 535/5820 (9.19%)   | 0.4768789255 |
| Cad1p  | 62/449 (13.81%)  | 794/5820 (13.64%)  | 0.4801854069 |
| Gal80p | 7/449 (1.56%)    | 85/5820 (1.46%)    | 0.4865950589 |
| Stb4p  | 7/449 (1.56%)    | 85/5820 (1.46%)    | 0.4865950589 |
| Mot2p  | 10/449 (2.23%)   | 124/5820 (2.13%)   | 0.4904267456 |
| Met28p | 18/449 (4.01%)   | 229/5820 (3.93%)   | 0.5036277788 |
| Sip4p  | 19/449 (4.23%)   | 242/5820 (4.16%)   | 0.5038874613 |
| Hir1p  | 25/449 (5.57%)   | 320/5820 (5.5%)    | 0.5052580091 |
| Ssn3p  | 7/449 (1.56%)    | 87/5820 (1.49%)    | 0.5117243859 |
| Nsi1p  | 7/449 (1.56%)    | 88/5820 (1.51%)    | 0.5241301305 |
| Snf1p  | 21/449 (4.68%)   | 272/5820 (4.67%)   | 0.5330728956 |
| Arg82p | 11/449 (2.45%)   | 142/5820 (2.44%)   | 0.5407007681 |
| Aft2p  | 37/449 (8.24%)   | 486/5820 (8.35%)   | 0.5620151188 |
| Dot6p  | 12/449 (2.67%)   | 159/5820 (2.73%)   | 0.5761484453 |
| Gts1p  | 38/449 (8.46%)   | 504/5820 (8.66%)   | 0.5878764165 |
| Mth1p  | 26/449 (5.79%)   | 346/5820 (5.95%)   | 0.5883471912 |
| Nrg2p  | 26/449 (5.79%)   | 346/5820 (5.95%)   | 0.5883471912 |

|        |                  |                    |              |
|--------|------------------|--------------------|--------------|
| Wtm1p  | 14/449 (3.12%)   | 188/5820 (3.23%)   | 0.5965047554 |
| Fhl1p  | 94/449 (20.94%)  | 1241/5820 (21.32%) | 0.6024254741 |
| Yrr1p  | 54/449 (12.03%)  | 718/5820 (12.34%)  | 0.6056089202 |
| Mds3p  | 3/449 (0.67%)    | 40/5820 (0.69%)    | 0.6060692246 |
| Arg81p | 26/449 (5.79%)   | 349/5820 (6%)      | 0.6067803312 |
| Rts2p  | 3/449 (0.67%)    | 41/5820 (0.7%)     | 0.6230725884 |
| Ngg1p  | 5/449 (1.11%)    | 69/5820 (1.19%)    | 0.6242403111 |
| Gcn4p  | 228/449 (50.78%) | 2994/5820 (51.44%) | 0.6339769625 |
| Fkh1p  | 60/449 (13.36%)  | 807/5820 (13.87%)  | 0.6479051948 |
| Cat8p  | 16/449 (3.56%)   | 223/5820 (3.83%)   | 0.6584998376 |
| Stb2p  | 16/449 (3.56%)   | 224/5820 (3.85%)   | 0.6655907805 |
| Plm2p  | 13/449 (2.9%)    | 185/5820 (3.18%)   | 0.6799509653 |
| Cup2p  | 42/449 (9.35%)   | 578/5820 (9.93%)   | 0.6892714479 |
| Hir3p  | 29/449 (6.46%)   | 405/5820 (6.96%)   | 0.6959416899 |
| Gat3p  | 32/449 (7.13%)   | 446/5820 (7.66%)   | 0.6988356875 |
| Sut2p  | 12/449 (2.67%)   | 174/5820 (2.99%)   | 0.7011077402 |
| Hel2p  | 14/449 (3.12%)   | 203/5820 (3.49%)   | 0.7104103146 |
| Rgm1p  | 28/449 (6.24%)   | 395/5820 (6.79%)   | 0.7138525945 |
| Ask10p | 10/449 (2.23%)   | 148/5820 (2.54%)   | 0.7159087759 |
| Rds1p  | 18/449 (4.01%)   | 260/5820 (4.47%)   | 0.7219744191 |
| Tbf1p  | 36/449 (8.02%)   | 505/5820 (8.68%)   | 0.7226160283 |
| Hcm1p  | 30/449 (6.68%)   | 424/5820 (7.29%)   | 0.7231607299 |
| Rlf2p  | 61/449 (13.59%)  | 840/5820 (14.43%)  | 0.7232777043 |
| Hap3p  | 21/449 (4.68%)   | 303/5820 (5.21%)   | 0.7320360593 |
| Ime1p  | 8/449 (1.78%)    | 122/5820 (2.1%)    | 0.7350908184 |
| Sin3p  | 132/449 (29.4%)  | 1782/5820 (30.62%) | 0.7368166471 |
| Ixr1p  | 128/449 (28.51%) | 1732/5820 (29.76%) | 0.7434549083 |
| Sas3p  | 86/449 (19.15%)  | 1183/5820 (20.33%) | 0.7576095511 |
| Rph1p  | 32/449 (7.13%)   | 463/5820 (7.96%)   | 0.7755081053 |
| Vms1p  | 12/449 (2.67%)   | 185/5820 (3.18%)   | 0.7768685274 |
| Met18p | 16/449 (3.56%)   | 242/5820 (4.16%)   | 0.7786462337 |

|         |                  |                    |              |
|---------|------------------|--------------------|--------------|
| Gat1p   | 14/449 (3.12%)   | 214/5820 (3.68%)   | 0.7801337968 |
| YLR278C | 29/449 (6.46%)   | 425/5820 (7.3%)    | 0.7886888276 |
| Tos4p   | 13/449 (2.9%)    | 202/5820 (3.47%)   | 0.7930115087 |
| YER130C | 11/449 (2.45%)   | 174/5820 (2.99%)   | 0.7975303384 |
| Rif1p   | 24/449 (5.35%)   | 358/5820 (6.15%)   | 0.7981544717 |
| Stp4p   | 11/449 (2.45%)   | 176/5820 (3.02%)   | 0.8093322602 |
| War1p   | 5/449 (1.11%)    | 87/5820 (1.49%)    | 0.8122332944 |
| Hst4p   | 8/449 (1.78%)    | 134/5820 (2.3%)    | 0.8225700772 |
| Rif2p   | 4/449 (0.89%)    | 73/5820 (1.25%)    | 0.8256688615 |
| Tos8p   | 27/449 (6.01%)   | 407/5820 (6.99%)   | 0.826827823  |
| Srd1p   | 3/449 (0.67%)    | 57/5820 (0.98%)    | 0.8272282664 |
| Snt2p   | 8/449 (1.78%)    | 135/5820 (2.32%)   | 0.8287270196 |
| Spt2p   | 25/449 (5.57%)   | 386/5820 (6.63%)   | 0.8520617732 |
| Hmo1p   | 70/449 (15.59%)  | 1010/5820 (17.35%) | 0.8631939717 |
| Rsf2p   | 28/449 (6.24%)   | 433/5820 (7.44%)   | 0.8668645794 |
| Sfp1p   | 325/449 (72.38%) | 4335/5820 (74.48%) | 0.8681812133 |
| Mig1p   | 29/449 (6.46%)   | 449/5820 (7.71%)   | 0.8723918702 |
| Sas5p   | 20/449 (4.45%)   | 321/5820 (5.52%)   | 0.8733985054 |
| Aft1p   | 97/449 (21.6%)   | 1385/5820 (23.8%)  | 0.8845224537 |
| Leu3p   | 44/449 (9.8%)    | 665/5820 (11.43%)  | 0.8875620101 |
| Haa1p   | 44/449 (9.8%)    | 667/5820 (11.46%)  | 0.8919306746 |
| Not3p   | 14/449 (3.12%)   | 239/5820 (4.11%)   | 0.8929724008 |
| Pop2p   | 10/449 (2.23%)   | 179/5820 (3.08%)   | 0.8945262798 |
| Pgd1p   | 28/449 (6.24%)   | 444/5820 (7.63%)   | 0.8969567561 |
| Tod6p   | 4/449 (0.89%)    | 84/5820 (1.44%)    | 0.8979744454 |
| Dal82p  | 54/449 (12.03%)  | 812/5820 (13.95%)  | 0.9044601551 |
| Sps18p  | 18/449 (4.01%)   | 303/5820 (5.21%)   | 0.9070193541 |
| YPR196W | 9/449 (2%)       | 167/5820 (2.87%)   | 0.9072194997 |
| Wtm2p   | 9/449 (2%)       | 168/5820 (2.89%)   | 0.910689447  |
| Yap5p   | 58/449 (12.92%)  | 874/5820 (15.02%)  | 0.9159134771 |
| Sir3p   | 57/449 (12.69%)  | 863/5820 (14.83%)  | 0.9203590124 |



|        |                  |                    |              |
|--------|------------------|--------------------|--------------|
| Oaf1p  | 59/449 (13.14%)  | 891/5820 (15.31%)  | 0.9208639922 |
| Fzf1p  | 11/449 (2.45%)   | 203/5820 (3.49%)   | 0.9225169465 |
| Yrm1p  | 187/449 (41.65%) | 2605/5820 (44.76%) | 0.9238346219 |
| Rpi1p  | 9/449 (2%)       | 173/5820 (2.97%)   | 0.9264367346 |
| Ash1p  | 231/449 (51.45%) | 3188/5820 (54.78%) | 0.9361513787 |
| Reb1p  | 67/449 (14.92%)  | 1013/5820 (17.41%) | 0.9365276669 |
| Pog1p  | 4/449 (0.89%)    | 94/5820 (1.62%)    | 0.9393387523 |
| Arg80p | 23/449 (5.12%)   | 395/5820 (6.79%)   | 0.9448932859 |
| Adr1p  | 53/449 (11.8%)   | 827/5820 (14.21%)  | 0.9467645113 |
| Gsm1p  | 8/449 (1.78%)    | 169/5820 (2.9%)    | 0.9557225414 |
| Otu1p  | 17/449 (3.79%)   | 328/5820 (5.64%)   | 0.9748675864 |
| Caf4p  | 8/449 (1.78%)    | 189/5820 (3.25%)   | 0.9822314793 |
| Oaf3p  | 22/449 (4.9%)    | 416/5820 (7.15%)   | 0.9823798301 |
| Arr1p  | 105/449 (23.39%) | 1601/5820 (27.51%) | 0.9828979304 |
| Pdr3p  | 73/449 (16.26%)  | 1177/5820 (20.22%) | 0.9888350374 |
| Ppr1p  | 7/449 (1.56%)    | 192/5820 (3.3%)    | 0.9938121752 |
| Sip3p  | 1/449 (0.22%)    | 65/5820 (1.12%)    | 0.9947456995 |
| Sef1p  | 10/449 (2.23%)   | 252/5820 (4.33%)   | 0.9953243172 |
| Spt23p | 114/449 (25.39%) | 1827/5820 (31.39%) | 0.998426351  |
| Msn4p  | 168/449 (37.42%) | 2565/5820 (44.07%) | 0.9987526064 |
| Abf1p  | 183/449 (40.76%) | 2811/5820 (48.3%)  | 0.9996489116 |
| Ndd1p  | 1/449 (0.22%)    | 107/5820 (1.84%)   | 0.9998288765 |
| Ace2p  | 339/449 (75.5%)  | 4775/5820 (82.04%) | 0.9998882044 |
| Msn2p  | 226/449 (50.33%) | 3411/5820 (58.61%) | 0.9999049572 |
| Ste12p | 253/449 (56.35%) | 3852/5820 (66.19%) | 0.9999974505 |
| Tec1p  | 247/449 (55.01%) | 3818/5820 (65.6%)  | 0.9999994805 |
| Yap1p  | 168/449 (37.42%) | 2959/5820 (50.84%) | 0.999999999  |
| Met4p  | 44/449 (9.8%)    | 1548/5820 (26.6%)  | 1            |

$\alpha^{\text{BON}} = 1.72 \times 10^{-4}$

**(E) Overlap of upregulated genes in a continuously growing batch culture and up-regulated genes in  $\Delta reg1$  and  $\Delta ssb1\Delta ssb2$ , respectively.**

| OD <sub>600</sub> | Strain                   | Overlap Frequency | Background frequency | p-value      | significant overlap |
|-------------------|--------------------------|-------------------|----------------------|--------------|---------------------|
| 0.46              | $\Delta reg1$            | 13/545 (2.39%)    | 124/5820 (2.13%)     | 0.3767750015 | no                  |
| 0.46              | $\Delta ssb1\Delta ssb2$ | 8/426 (1.88%)     | 124/5820 (2.13%)     | 0.6966371507 | no                  |
| 0.80              | $\Delta reg1$            | 54/545 (9.91%)    | 400/5820 (6.87%)     | 0.0031765547 | yes                 |
| 0.80              | $\Delta ssb1\Delta ssb2$ | 56/426 (13.15%)   | 400/5820 (6.87%)     | 1.0228022E-6 | yes                 |
| 1.80              | $\Delta reg1$            | 46/545 (8.44%)    | 139/5820 (2.39%)     | 3.200567E-15 | yes                 |
| 1.80              | $\Delta ssb1\Delta ssb2$ | 47/426 (11.03%)   | 139/5820 (2.39%)     | 2.349212E-20 | yes                 |
| 3.70              | $\Delta reg1$            | 47/545 (8.62%)    | 200/5820 (3.44%)     | 1.3033217E-9 | yes                 |
| 3.70              | $\Delta ssb1\Delta ssb2$ | 59/426 (13.85%)   | 200/5820 (3.44%)     | 5.948475E-22 | yes                 |
| 6.90              | $\Delta reg1$            | 310/545 (56.88%)  | 1380/5820 (23.71%)   | 2.49742E-69  | yes                 |
| 6.90              | $\Delta ssb1\Delta ssb2$ | 168/426 (39.44%)  | 1380/5820 (23.71%)   | 4.047573E-14 | yes                 |
| 7.30              | $\Delta reg1$            | 277/545 (50.83%)  | 833/5820 (14.31%)    | 2.67721E-104 | yes                 |
| 7.30              | $\Delta ssb1\Delta ssb2$ | 149/426 (34.98%)  | 833/5820 (14.31%)    | 3.381602E-29 | yes                 |

**Table S4.** Crosslinking data. See Table S4.xls

**SUPPLEMENTAL REFERENCES**

1. Chen, L., Jiao, Z.H., Zheng, L.S., Zhang, Y.Y., Xie, S.T., Wang, Z.X., and Wu, J.W. (2009) Structural insight into the autoinhibition mechanism of AMP-activated protein kinase. *Nature*, **459**, 1146-1149.
2. Chen, L., Xin, F.-J., Wang, J., Hu, J., Zhang, Y.-Y., Wan, S., Cao, L.-S., Lu, C., Li, P., Yan, S.F., *et al.* (2013) Conserved regulatory elements in AMPK. *Nature*, **498**, E8-E10.
3. Xin, F.-J., Wang, J., Zhao, R.-Q., Wang, Z.-X., and Wu, J.-W. (2013) Coordinated regulation of AMPK activity by multiple elements in the [alpha]-subunit. *Cell Res*, **23**, 1237-1240.
4. Muslin, A.J., Tanner, J.W., Allen, P.M., and Shaw, A.S. (1996) Interaction of 14-3-3 with signaling proteins is mediated by the recognition of phosphoserine. *Cell*, **84**, 889-897.

5. Coblitz, B., Wu, M., Shikano, S., and Li, M. (2006) C-terminal binding: an expanded repertoire and function of 14-3-3 proteins. *FEBS Lett*, **580**, 1531-1535.
6. Panni, S., Montecchi-Palazzi, L., Kiemer, L., Cabibbo, A., Paoluzi, S., Santonico, E., Landgraf, C., Volkmer-Engert, R., Bachi, A., Castagnoli, L., *et al.* (2011) Combining peptide recognition specificity and context information for the prediction of the 14-3-3-mediated interactome in *S. cerevisiae* and *H. sapiens*. *Proteomics*, **11**, 128-143.
7. Ben-Shem, A., Garreau de Loubresse, N., Melnikov, S., Jenner, L., Yusupova, G., and Yusupov, M. (2011) The structure of the eukaryotic ribosome at 3.0 Å resolution. *Science*, **334**, 1524-1529.
8. Jenner, L., Melnikov, S., de Loubresse, N.G., Ben-Shem, A., Iskakova, M., Urzhumtsev, A., Meskauskas, A., Dinman, J., Yusupova, G., and Yusupov, M. (2012) Crystal structure of the 80S yeast ribosome. *Curr Opin Struct Biol*, **22**, 759-767.
9. Raue, U., Oellerer, S., and Rospert, S. (2007) Association of protein biogenesis factors at the yeast ribosomal tunnel exit is affected by the translational status and nascent polypeptide sequence. *J Biol Chem*, **282**, 7809-7816.
10. Ghaemmaghami, S., Huh, W.K., Bower, K., Howson, R.W., Belle, A., Dephoure, N., O'Shea, E.K., and Weissman, J.S. (2003) Global analysis of protein expression in yeast. *Nature*, **425**, 737-741.
11. Obsil, T., and Obsilova, V. (2011) Structural basis of 14-3-3 protein functions. *Semin Cell Dev Biol*, **22**, 663-672.
12. Kakiuchi, K., Yamauchi, Y., Taoka, M., Iwago, M., Fujita, T., Ito, T., Song, S.Y., Sakai, A., Isobe, T., and Ichimura, T. (2007) Proteomic analysis of in vivo 14-3-3 interactions in the yeast *Saccharomyces cerevisiae*. *Biochemistry*, **46**, 7781-7792.
13. Teixeira, M.C., Monteiro, P.T., Guerreiro, J.F., Goncalves, J.P., Mira, N.P., dos Santos, S.C., Cabrito, T.R., Palma, M., Costa, C., Francisco, A.P., *et al.* (2014) The YEASTRACT database: an upgraded information system for the analysis of gene and genomic transcription regulation in *Saccharomyces cerevisiae*. *Nucleic Acids Res*, **42**, D161-166.
14. Joseph-Horne, T., Hollomon, D.W., and Wood, P.M. (2001) Fungal respiration: a fusion of standard and alternative components. *Biochim Biophys Acta*, **1504**, 179-195.
15. Heitman, J., Movva, N.R., Hiestand, P.C., and Hall, M.N. (1991) FK 506-binding protein proline rotamase is a target for the immunosuppressive agent FK 506 in *Saccharomyces cerevisiae*. *Proc Natl Acad Sci USA*, **88**, 1948-1952.
16. Rakwalska, M., and Rospert, S. (2004) The Ribosome-Bound Chaperones RAC and Ssb1/2p are Required for Accurate Translation in *Saccharomyces cerevisiae*. *Mol Cell Biol*, **24**, 9186-9197.
17. von Plehwe, U., Berndt, U., Conz, C., Chiabudini, M., Fitzke, E., Sickmann, A., Petersen, A., Pfeifer, D., and Rospert, S. (2009) The Hsp70 homolog Ssb is essential for glucose sensing via the SNF1 kinase network. *Genes Dev*, **23**, 2102-2115.
